# Supplementary material for: Broad phylogenomic sampling improves resolution of the animal tree of life
Source: Springer Nature journal article supplement (doi:10.1038/nature06614), 2008-03-05
Supplement: 41586_2008_BFnature06614_MOESM1_ESM.pdf [file 41586_2008_BFnature06614_MOESM1_ESM.pdf]

## Supplementary Discussion

### Comparisons of gene selection strategies

There is relatively little overlap between the 150 genes selected by our approach, the manually curated list of 146 target genes used in most metazoan phylogenomic studies<sup>9</sup>, and the 43 genes amplified by directed PCR (via 50 primer combinations) in another recent report<sup>13</sup> (Supplementary Tables 3,4; Supplementary Fig. 4). The union of the two previously published sets of genes listed above includes markers that are also commonly sequenced in smaller-scale phylogenetic studies (e.g. *elongation factor-2*, *ATPase alpha-subunit*, *70 kDa heat shock proteins*, and *DNA-directed RNA polymerase II largest subunit*) but that are rejected by our gene selection strategy. The matrix assembly results presented here therefore have the potential to inform gene selection both in future phylogenomic studies and more traditional phylogenetic investigations based on directed PCR of a small number of genes.

Examination of relevant selection metrics (Supplementary Table 4) indicates that most of the 126 genes from these other datasets that are rejected by our selection strategy pass the taxon sampling criteria imposed here (79 genes), but that most (68 genes) fail the criteria imposed on the median (must equal one) and mean (must be less than 2.5) number of sequences per taxon. Twenty-eight genes that passed these criteria were found to have clustering properties that indicate potential paralogy issues or were found to have paralogy problems when evaluated phylogenetically (see Methods for explanations of these criteria). Although 40 ribosomal proteins are included in our final matrix, 30 ribosomal proteins used in these previous studies were rejected (Supplementary Table 4), many due to paralogy problems observed following phylogenetic analysis. This indicates that the assembly of phylogenomic datasets exclusively from the 70 or more ribosomal proteins that may be recovered in a typical EST screen, which has been done in some studies in part because of their abundance in EST surveys<sup>41</sup>, may lead to

systematic error due to paralogy problems. Ribosomal proteins should be carefully evaluated for paralogy, the same as for any other type of gene.

All of the genes shared between our matrix and one or both of the other matrices have one-to-one mapping across studies (Supplementary Table 4). There is not always a one-to-one mapping, however, between genes rejected from our matrix and the corresponding genes included in other matrices. Mapping can be many-to-one, as where clusters 275, 561, and 970 all map to *vata* from the Philippe et al. matrix<sup>9</sup>. Mapping can also be one-to-many or many-to-many, as for the *psma* genes. Mappings other than one-to-one indicate genes for which different studies disagree on paralogy assignment, with, for instance, one study grouping together all sequences as a single gene that another study assigned to multiple genes. The acceptance of only those genes with one-to-one mapping across studies, even though this was not part of the actual selection criteria, is one indication that our gene selection strategy is quite conservative.

We assembled a matrix of the genes used in most other animal phylogenomic studies<sup>9</sup> for the 64 stable taxa. Phylogenetic analyses of this alternative matrix (Supplementary Fig. 5) produce trees that are largely congruent with analyses of our own matrix. There are several differences in topology (e.g. neither Annelida nor Chordata are monophyletic in the alternative tree), but the general agreement between two matrices of similar size that differ by more than 100 genes shows that estimates of the animal phylogeny converge with large amounts of molecular sequence data, and that the major findings of the present study are not artefacts of a particular set of genes. The similarity of trees inferred from the two matrices also indicates that many of the genes rejected by our approach may not have paralogy problems, and that the gene selection method presented here is probably quite conservative. Our criteria for the mean and median number of sequences per taxon, for example, may be more restrictive than is absolutely necessary.

Gene accumulation plots based on our dataset (Supplementary Fig. 6) indicate that slightly more genes are obtained from the standard predefined list<sup>9</sup> when sequencing fewer than 1600 ESTs. Beyond this, in the range of most EST studies, more genes are obtained by our method.

Rejection of genes without paralogy problems could be reduced in future studies by applying less stringent phenetic gene-selection criteria (such as the cutoffs for mean and median number of sequences per taxon, which are computationally inexpensive) and evaluating proportionally more genes with phylogenetic tools (which is more computationally expensive). Like other animal phylogenomic studies, our original assignment of genes to orthologous groups is itself phenetic, relying on sequence similarity, though it takes into account more information by clustering with a graph theory approach rather than relying on BLAST ranks. One could avoid rejecting paralogs that diverged prior to the radiation of the group of interest (and hence could be informative for the problem at hand) by making the initial clustering less stringent, generating a smaller number of larger clusters. Each cluster would then be evaluated phylogenetically, and informative sub-trees pruned away as their own clusters.

### **Ribosomal vs. Non-ribosomal proteins**

As noted above, the 150 genes in our final matrix include 40 ribosomal proteins for which no paralogy problems were identified. All 40 of the ribosomal proteins fall within the top 44 best-sampled genes across taxa (Supplementary Table 3), so they constitute a disproportionately large fraction of the character data. We therefore partitioned the 64-taxon matrix into two matrices, one consisting of the 40 ribosomal proteins (5526 aa long, 30.7% missing characters) and the remaining 110 non-ribosomal proteins (15626 aa long, 61.0% missing characters).

Comparisons between ML bootstrap support values derived from the non-ribosomal, ribosomal, and combined matrices (Supplementary Fig. 10) show that bootstrap support from the combined matrix is greater than or equal to the support derived from either sub-matrix for most nodes. These nodes indicate features of the tree for which there is no conflict between the ribosomal and non-ribosomal partitions. At many such nodes support is much greater when all genes are analyzed in combination. These include Clade A, Clade B, and the node that places ctenophores as the earliest branching metazoans. This is an encouraging result, as other nodes that remain recalcitrant in the present study of 150 genes may be resolved as even more genes are considered (through deeper EST sequencing or improved gene selection methods).

Ribosomal support is greater than combined support at nine ingroup nodes (Supplementary Fig. 10). At these nodes there is conflict between the partitions but signal from the ribosomal proteins contributed more strongly to the combined analysis than did signal from non-ribosomal proteins. With the exception of the node uniting *Drosophila melanogaster* and *Daphnia magna*, where the combined and ribosomal analyses differ in support by only 1%, none of these nodes had greater than 76% bootstrap support in the combined analyses and are not relevant to the major conclusions of the paper. Bias from ribosomal proteins that conflict with other genes therefore does not appear to be a problem in our study. Non-ribosomal support is greater than combined support at only two ingroup nodes, Cnidaria and Nematoda.

### Gene lengths

Genes selected for phylogenetic analysis by our method tend to be slightly shorter than those in the population as a whole (Supplementary Fig. 7). A similar bias towards shorter genes is also apparent in the matrix of the genes used in most other animal phylogenomic studies<sup>9</sup>, though it is less pronounced. The selection of shorter proteins may be due to an enrichment for highly expressed genes that maximize gene intersection across taxa. It has previously been found

that gene expression levels vary inversely with gene length<sup>42</sup>, perhaps due to stronger selection on highly expressed genes to be shorter so as to reduce overall amino acid use.

Since all ESTs were sequenced from the 5' end and mRNA was enriched for complete transcripts, most gene sequences presented here will be complete at the 5' end. 59.65% of genes derived from our EST data are complete at the 3' end, as determined by the presence of a stop codon. Since the length of genes without a stop codon is underestimated, we also considered only those genes with a stop codon, and found a similar pattern in gene length (Supplementary Fig. 7).

## **Tardigrada**

WAG analyses (both ML and Bayesian) do not recover Panarthropoda and favour a close relationship between tardigrades, nematodes, and a nematomorph (Fig. 1, Supplementary Fig. 9). However, of the 15 independent 64-taxon Bayesian runs based on the CAT model of evolution, 13 recover the morphologically-founded groups Cycloneuralia (i.e., Priapulida, Kinorhyncha, Nematomorpha, and Nematoda) and Panarthropoda (with Tardigrada as sister to Onychophora +Arthropoda), each with a posterior probability of 98% or greater. The other two CAT Bayesian runs place the clade composed of the kinorhynch and priapulid as sister to the remaining ecdysozoans (posterior probability of 100%), and place the tardigrades in a clade with the nematomorph and nematodes (also with a posterior probability of 100%). This leads to insignificant posterior probabilities of 86% for Panarthropoda and Cycloneuralia when the posterior distributions of trees are combined across runs (Fig. 2) and illustrates the large computational burden of phylogenomic analyses, since a small number of runs may not have revealed this lack of convergence. The strong dependence on the model of molecular evolution for the placement of the tardigrades indicates that at least one of these models is prone to systematic error for this particular problem. The two alternative placements of tardigrades

determine whether paired panarthropod appendages have a single or dual origin, but both topologies identify unique onychophoran-arthropod synapomorphies such as a dorsal heart with segmental ostia and open, haemocoelic circulation as shared derived characters.

## Supplementary Tables

**Supplementary Table 1 | Specimen data for sequenced taxa.** RL- tissue was stored in RNAlater prior to preparation. CVBS- Connecticut Valley Biological Supply (USA). dbEST- indicates that our data were supplemented with sequences from dbEST.

| Species                              | Number of ESTs | Number of Matrix Genes | Tissue                       | Collection Location                                | Extraction method |
|--------------------------------------|----------------|------------------------|------------------------------|----------------------------------------------------|-------------------|
| <i>Anoplodactylus eroticus</i>       | 3744           | 81                     | embryos, larvae              | Honolulu, HI, USA                                  | TRI REAGENT       |
| <i>Brachionus plicatilis</i>         | 3552           | 94                     | whole animals                | Culture                                            | Dynabeads         |
| <i>Bugula neritina</i>               | 3360           | 92                     | hatched larvae               | Honolulu, HI, USA                                  | Dynabeads         |
| <i>Carinoma mutabilis</i>            | 3168           | 62                     | whole animal                 | Friday Harbor, WA, USA                             | TRI REAGENT       |
| <i>Cerebratulus lacteus</i>          | 6144           | 80                     | embryos (cleavage, gastrula) | Woods Hole, MA, USA                                | TRI REAGENT       |
| <i>Chaetoderma nitidulum</i>         | 1632           | 47                     | parts of whole animal (RL)   | Kristineberg Marine Station, Fiskebackskil, Sweden | Rneasy Micro      |
| <i>Chaetopleura apiculata</i>        | 2304           | 45                     | gills                        | Woods Hole, MA, USA                                | TRI REAGENT       |
| <i>Chaetopterus</i> sp.              | 3360           | 79                     | embryos                      | Woods Hole, MA, USA                                | TRI REAGENT       |
| <i>Cristatella mucedo</i>            | 3264           | 85                     | statoblasts                  | Kristineberg, Sweden                               | TRI REAGENT       |
| <i>Echinoderes horni</i>             | 3264           | 74                     | whole adults                 | Honolulu, HI, USA                                  | RNAqueous-Micro   |
| <i>Euperipatoides kanangrensis</i>   | 3360           | 81                     | two brains and muscle tissue | Kanangra-Boyd National Park, NSW, Australia        | RNAqueous-Micro   |
| <i>Gnathostomula peregrina</i>       | 3552           | 73                     | whole animals                | Bermuda                                            | RNAqueous-Micro   |
| Mertensiid sp.                       | 3072           | 62                     | adult                        | Monterey, CA, USA                                  | Rneasy Micro      |
| <i>Mnemiopsis leidyi</i>             | 3360 (+dbEST)  | 110                    | early cleavage to gastrula   | Woods Hole, MA, USA                                | TRI REAGENT       |
| <i>Myzostoma seymour-collegiorum</i> | 1056           | 46                     | whole animals (RL)           | Encounter Bay, Australia                           | Rneasy Micro      |
| <i>Neochildia fusca</i>              | 1728           | 21                     | whole animals (RL)           | Woods Hole, MA, USA                                | Rneasy Micro      |
| <i>Paraplanocera</i> sp.             | 3744           | 85                     | whole animal                 | Honolulu, HI, USA                                  | TRI REAGENT       |
| <i>Pedicellina cernua</i>            | 5184           | 33                     | whole animals                | Kristineberg, Sweden                               | RNAqueous-Micro   |

| Species                        | Number of ESTs        | Number of Matrix Genes | Tissue                           | Collection Location    | Extraction method |
|--------------------------------|-----------------------|------------------------|----------------------------------|------------------------|-------------------|
| <i>Philodina roseola</i>       | 3168                  | 82                     | whole animals                    | culture (CVBS)         | RNeasy micro      |
| <i>Phoronis vancouverensis</i> | 2208                  | 27                     | "heads" (RL)                     | Friday Harbor, WA, USA | Rneasy Micro      |
| <i>Ptychodera flava</i>        | 3360                  | 89                     | adult colar                      | Honolulu, HI, USA      | TRI REAGENT       |
| <i>Richtersius coronifer</i>   | 3360                  | 66                     | whole adults                     | Öland, Sweden          | TRI REAGENT       |
| <i>Scutigera coleoptrata</i>   | 2400                  | 66                     | part of whole animal (RL)        | Cambridge, MA, USA     | Dynabeads         |
| <i>Spinochordodes tellinii</i> | 2208                  | 25                     | part of whole animal (RL)        | Montpellier, France    | TRI REAGENT       |
| <i>Terebratalia transversa</i> | 3552                  | 91                     | embryos/larvae (RL)              | Friday Harbor, WA, USA | Rneasy Micro      |
| <i>Themiste lageniformis</i>   | 2640                  | 70                     | embryos (cleavage, gastrula)     | Honolulu, HI, USA      | TRI REAGENT       |
| <i>Turbanella ambronensis</i>  | 3264                  | 61                     | whole animals (RL)               | Wilhelmshaven, Germany | RNAqueos-Micro    |
| <i>Urechis caupo</i>           | 2208                  | 78                     | internal tissue (gland, nervous) | Santa Barbara, CA, USA | TRI REAGENT       |
| <i>Xenoturbella bocki</i>      | 3840 (+2137 71 dbEST) |                        | part of whole animal (RL)        | Strömstad, Sweden      | Rneasy Micro      |



**Supplementary Table 2 | Taxa from previously published EST projects and genomic data used in this analysis.** dbEST—<http://www.ncbi.nlm.nih.gov/dbEST/>, HG— <http://www.ncbi.nlm.nih.gov/HomoloGene/>, JGI—<http://www.jgi.doe.gov/>.

| Taxon                               | Source                                                                                                                                            | Number of Genes |
|-------------------------------------|---------------------------------------------------------------------------------------------------------------------------------------------------|-----------------|
| <i>Acanthoscurria gomesiana</i>     | dbEST                                                                                                                                             | 83              |
| <i>Acropora millepora</i>           | dbEST                                                                                                                                             | 101             |
| <i>Amoebidium parasiticum</i>       | dbEST                                                                                                                                             | 59              |
| <i>Aplysia californica</i>          | dbEST                                                                                                                                             | 22              |
| <i>Argopecten irradians</i>         | dbEST                                                                                                                                             | 81              |
| <i>Asterina pectinifera</i>         | dbEST                                                                                                                                             | 123             |
| <i>Biomphalaria glabrata</i>        | dbEST                                                                                                                                             | 79              |
| <i>Boophilus microplus</i>          | dbEST                                                                                                                                             | 105             |
| <i>Branchiostoma floridae</i>       | dbEST                                                                                                                                             | 101             |
| <i>Capitella</i> sp.                | JGI                                                                                                                                               | 116             |
| <i>Capsaspora owczarzaki</i>        | dbEST                                                                                                                                             | 98              |
| <i>Carcinoscorpius rotundicauda</i> | dbEST                                                                                                                                             | 18              |
| <i>Carcinus maenas</i>              | dbEST                                                                                                                                             | 63              |
| <i>Ciona intestinalis</i>           | JGI                                                                                                                                               | 125             |
| <i>Crassostrea virginica</i>        | dbEST                                                                                                                                             | 82              |
| <i>Cryptococcus neoformans</i>      | <a href="http://www-sequence.stanford.edu/group/C.neoformans/download.html">http://www-sequence.stanford.edu/group/C.neoformans/download.html</a> | 114             |
| <i>Cyanea capillata</i>             | from authors <sup>43</sup>                                                                                                                        | 75              |
| <i>Daphnia magna</i>                | dbEST                                                                                                                                             | 83              |
| <i>Drosophila melanogaster</i>      | HG                                                                                                                                                | 141             |
| <i>Dugesia japonica</i>             | dbEST                                                                                                                                             | 59              |
| <i>Echinococcus granulosus</i>      | dbEST                                                                                                                                             | 92              |
| <i>Euprymna scolopes</i>            | dbEST                                                                                                                                             | 87              |
| <i>Fenneropenaeus chinensis</i>     | dbEST                                                                                                                                             | 74              |
| <i>Flacisagitta enflata</i>         | assembled from original EST traces <sup>44</sup>                                                                                                  | 66              |
| <i>Gallus gallus</i>                | HG                                                                                                                                                | 116             |
| <i>Haementeria depressa</i>         | dbEST                                                                                                                                             | 42              |
| <i>Homo sapiens</i>                 | HG                                                                                                                                                | 125             |
| <i>Hydra magnipapillata</i>         | <a href="http://mpc.uci.edu/hampson/public_html/blast/jf9/">http://mpc.uci.edu/hampson/public_html/blast/jf9/</a>                                 | 93              |
| <i>Hydractinia echinata</i>         | dbEST                                                                                                                                             | 77              |
| <i>Hypsibius dujardini</i>          | dbEST                                                                                                                                             | 90              |
| <i>Lumbricus rubellus</i>           | dbEST                                                                                                                                             | 106             |
| <i>Macrostomum lignano</i>          | <a href="http://macest.biology.ucla.edu/macest/">http://macest.biology.ucla.edu/macest/</a>                                                       | 56              |
| <i>Monosiga ovata</i>               | dbEST                                                                                                                                             | 80              |
| <i>Mytilus galloprovincialis</i>    | dbEST                                                                                                                                             | 66              |
| <i>Nematostella vectensis</i>       | JGI                                                                                                                                               | 137             |
| <i>Oscarella carmela</i>            | dbEST                                                                                                                                             | 35              |
| <i>Platynereis dumerilii</i>        | Genbank                                                                                                                                           | 36              |
| <i>Priapulus caudatus</i>           | dbEST                                                                                                                                             | 24              |
| <i>Saccharomyces cerevisiae</i>     | <a href="http://mips.gsf.de/genre/proj/yeast/About/FTP_sites.html">http://mips.gsf.de/genre/proj/yeast/About/FTP_sites.html</a>                   | 101             |

| <b>Taxon</b>                         | <b>Source</b> | <b>Number<br/>of<br/>Genes</b> |
|--------------------------------------|---------------|--------------------------------|
| <i>Saccoglossus kowalevskii</i>      | dbEST         | 51                             |
| <i>Schmidtea mediterranea</i>        | dbEST         | 129                            |
| <i>Spadella cephaloptera</i>         | EMBL          | 35                             |
| <i>Sphaeroforma arctica</i>          | dbEST         | 88                             |
| <i>Strongylocentrotus purpuratus</i> | RefSeq        | 124                            |
| <i>Suberites domuncula</i>           | Genbank       | 45                             |
| <i>Symsagittifera roscoffensis</i>   | dbEST         | 33                             |
| <i>Trichinella spiralis</i>          | dbEST         | 78                             |
| <i>Xiphinema index</i>               | dbEST         | 86                             |

**Supplementary Table 3 | Genes selected for phylogenetic analysis.** ID- the unique numerical identifier assigned to the gene during the clustering process (this number corresponds to the partition names within the nexus file), Description- the name of the gene as determined from one of the HomoloGene IDs, HomoloGene IDs- identifiers for HomoloGene groups, PG- the identifier of the gene in the matrix of Philippe et al.<sup>9</sup> (if the gene is in both matrices), Number of Taxa- the number of taxa in each cluster after paralog processing.

| ID  | Description                     | HomoloGene IDs                                         | PG     | Number of taxa |
|-----|---------------------------------|--------------------------------------------------------|--------|----------------|
| 143 | ribosomal protein L9            | 37328, 68697                                           | rpl9   | 70             |
| 243 | ribosomal protein S24 isoform c | 68148, 82521, 82583, 83665, 74661                      | -      | 68             |
| 268 | ribosomal protein L35a          | 6994                                                   | rpl33a | 66             |
| 199 | ribosomal protein S15           | 37414, 69555, 54806, 79584                             | rps15  | 64             |
| 232 | ribosomal protein L18a          | 68104, 757, 66212, 81127                               | rpl20  | 64             |
| 273 | ribosomal protein S11           | 789                                                    | rps11  | 63             |
| 184 | ribosomal protein L8            | 32141                                                  | rpl2   | 63             |
| 242 | ribosomal protein S16           | 794, 74778, 73355                                      | rps16  | 62             |
| 200 | ribosomal protein L17           | 81526, 81780, 83344, 67073, 78559, 83922, 66863, 83820 | rpl17  | 62             |
| 225 | ribosomal protein S12           | 36049, 53343, 54313, 54294                             | l12e-A | 62             |
| 211 | ribosomal protein S18           | 5747, 74651, 78628                                     | rps18  | 61             |
| 279 | ribosomal protein L26           | 764, 74758, 53471, 83250, 67813, 79103, 55206          | rpl26  | 61             |
| 169 | ribosomal protein L7a           | 39625, 79798, 79964, 72659, 83856, 83973               | l12e-D | 61             |
| 299 | ribosomal protein S17           | 68133, 54243, 68663, 50231                             | rps17  | 60             |
| 193 | ribosomal protein L27a          | 81527, 73905                                           | rpl27  | 60             |
| 179 | ribosomal protein L18           | 756, 66225, 83186                                      | rpl18  | 60             |
| 287 | ribosomal protein S27           | 803, 69197, 67034, 68802                               | rps27  | 59             |
| 260 | ribosomal protein S19           | 74380, 37416, 79606                                    | rps19  | 59             |
| 272 | ribosomal protein S13           | 38660                                                  | rps13a | 59             |
| 241 | ribosomal protein L37           | 68110, 81642, 82208, 78170, 82895                      | rpl37a | 59             |
| 305 | ribosomal protein L35           | 31432, 66665, 78302                                    | rpl35  | 59             |
| 213 | ribosomal protein L12           | 68673, 70329, 54987, 55157, 79120, 82909, 82997        | rpl12b | 59             |
| 271 | ribosomal protein P2            | 68111, 68655                                           | -      | 59             |
| 186 | ribosomal protein S8            | 786, 83687, 67837                                      | rps8   | 58             |
| 355 | ribosomal protein S29 isoform 1 | 83197, 83391                                           | rps29  | 58             |
| 236 | ribosomal protein S20           | 37417, 76418, 54224                                    | rps20  | 58             |
| 340 | ribosomal protein S21           | 37418, 54814                                           | -      | 58             |
| 351 | ribosomal protein L28           | 768                                                    | -      | 58             |
| 325 | ribosomal protein L14           | 68375, 2956, 42819                                     | rpl14a | 57             |
| 288 | ribosomal protein S25           | 68149, 48911                                           | rps25  | 56             |

| ID  | Description                                                                                        | HomoloGene IDs                    | PG     | Number of taxa |
|-----|----------------------------------------------------------------------------------------------------|-----------------------------------|--------|----------------|
| 356 | ribosomal protein L34                                                                              | 68109, 79505                      | rpl34  | 56             |
| 235 | ribosomal protein L23                                                                              | 68103, 67103                      | rpl23a | 55             |
| 233 | ribosomal protein L22 proprotein                                                                   | 37378, 69416, 46103, 67852, 82005 | rpl22  | 55             |
| 320 | ubiquitin-like protein fubi and ribosomal protein S30 precursor                                    | 37562, 54440                      | -      | 55             |
| 226 | ribosomal protein P1 isoform 1                                                                     | 37388, 52692, 66221, 83538        | rla2-B | 54             |
| 319 | ribosomal protein L36                                                                              | 41038, 65169, 78365, 17549        | -      | 52             |
| 345 | ribosomal protein L30                                                                              | 766, 79124, 83359                 | rpl30  | 51             |
| 156 | ribosomal protein L3 isoform a                                                                     | 747, 68434, 45874, 83790          | rpl3   | 51             |
| 174 | ribosomal protein L19                                                                              | 68105, 82497, 67865, 79127, 79129 | rpl19a | 50             |
| 330 | cytochrome c oxidase subunit III                                                                   | 5014, 55063                       | -      | 48             |
| 435 | signal sequence receptor gamma subunit                                                             | 5154, 82965                       | -      | 48             |
| 281 | cytochrome c oxidase subunit Va precursor                                                          | 37905                             | -      | 47             |
| 593 | ATP synthase, H <sup>+</sup> transporting, mitochondrial F1 complex, delta subunit precursor       | 37514                             | -      | 47             |
| 321 | ribosomal protein S28                                                                              | 68150, 49064                      | rps28a | 46             |
| 333 | cytochrome c                                                                                       | 68675                             | -      | 46             |
| 460 | tumor protein, translationally-controlled 1                                                        | 55730, 69044                      | -      | 45             |
| 352 | eukaryotic translation initiation factor 5A                                                        | 1490, 38886, 56219                | EIF5A  | 44             |
| 542 | eukaryotic translation initiation factor 1                                                         | 48375, 22219, 83852               | -      | 44             |
| 572 | ubiquinol-cytochrome c reductase, Rieske iron-sulfur polypeptide 1                                 | 4378                              | -      | 44             |
| 619 | Sec61 beta subunit                                                                                 | 38229, 80032                      | -      | 44             |
| 495 | ATP synthase, mitochondrial F1 complex, gamma subunit isoform H precursor                          | 3792                              | -      | 43             |
| 400 | cytochrome c oxidase subunit II                                                                    | 5017                              | -      | 42             |
| 532 | mitochondrial ATP synthase, O subunit precursor                                                    | 1283                              | -      | 42             |
| 550 | cytochrome c oxidase subunit IV isoform 1 precursor                                                | 37537, 13082                      | -      | 42             |
| 586 | signal sequence receptor, beta precursor                                                           | 2369                              | -      | 41             |
| 700 | endothelial differentiation-related factor 1 isoform alpha                                         | 2809                              | -      | 39             |
| 740 | defender against cell death 1                                                                      | 1027                              | -      | 39             |
| 686 | cytochrome c oxidase subunit VIa polypeptide 1 precursor                                           | 3219, 38020, 66386                | -      | 38             |
| 716 | ATP synthase, H <sup>+</sup> transporting, mitochondrial F0 complex, subunit b isoform 1 precursor | 1275                              | -      | 38             |
| 764 | signal sequence receptor, delta                                                                    | 4573                              | -      | 38             |
| 263 | NADH dehydrogenase subunit 1                                                                       | 5011                              | -      | 37             |
| 646 | NADH dehydrogenase (ubiquinone) Fe-S protein 6                                                     | 37935                             | -      | 37             |

| ID   | Description                                                                               | HomoloGene IDs      | PG     | Number of taxa |
|------|-------------------------------------------------------------------------------------------|---------------------|--------|----------------|
| 717  | heat shock 10kDa protein 1 (chaperonin 10)                                                | 20500, 68540        | -      | 37             |
| 703  | proteasome beta 4 subunit                                                                 | 2090                | psmb-N | 36             |
| 507  | Sec61 gamma subunit                                                                       | 40767, 83268        | -      | 36             |
| 508  | triosephosphate isomerase 1                                                               | 311, 82609          | -      | 36             |
| 739  | cytochrome c oxidase subunit Vb precursor                                                 | 37538, 44294        | -      | 36             |
| 696  | X-linked eukaryotic translation initiation factor 1A                                      | 20364, 81626        | if1a   | 35             |
| 369  | ATP synthase F0 subunit 6                                                                 | 5012                | -      | 35             |
| 726  | cytochrome c oxidase subunit VIb                                                          | 39658, 16948        | -      | 35             |
| 831  | signal sequence receptor, alpha                                                           | 2368                | -      | 35             |
| 585  | peroxiredoxin 6                                                                           | 3606, 71226         | -      | 34             |
| 629  | small nuclear ribonucleoprotein polypeptide D3                                            | 3078, 82194         | -      | 34             |
| 632  | skpA CG16983-PA, isoform A                                                                | 76877, 64484, 38775 | -      | 34             |
| 647  | clathrin, light polypeptide A isoform a                                                   | 1384, 37532         | -      | 34             |
| 832  | proliferating cell nuclear antigen                                                        | 1945, 77171         | -      | 34             |
| 905  | ATP synthase, H <sup>+</sup> transporting, mitochondrial F0 complex, subunit g            | 21294               | -      | 34             |
| 961  | G10 protein                                                                               | 2906                | -      | 34             |
| 805  | actin related protein 2/3 complex subunit 3                                               | 4178, 82221         | ar21   | 33             |
| 852  | NADH dehydrogenase (ubiquinone) Fe-S protein 4                                            | 1866                | -      | 33             |
| 896  | NADH dehydrogenase (ubiquinone) Fe-S protein 3                                            | 3346                | -      | 33             |
| 782  | ATP synthase, H <sup>+</sup> transporting, mitochondrial F0 complex, subunit f isoform 2a | 3594, 80715         | -      | 32             |
| 1006 | succinate dehydrogenase complex, subunit D precursor                                      | 37718, 80882        | -      | 32             |
| 1050 | cell death-regulatory protein GRIM19                                                      | 41083, 43992        | -      | 32             |
| 766  | UV excision repair protein RAD23 homolog B                                                | 37704, 48322        | rad23  | 31             |
| 613  | ubiquinol-cytochrome c reductase binding protein                                          | 38164, 78989        | -      | 31             |
| 765  | small nuclear ribonucleoprotein polypeptide E                                             | 37729, 40287        | -      | 31             |
| 850  | quinoid dihydropteridine reductase                                                        | 271                 | -      | 31             |
| 927  | beta-tubulin cofactor A                                                                   | 3388                | -      | 31             |
| 942  | NADH dehydrogenase (ubiquinone) flavoprotein 2, 24kDa                                     | 10884               | -      | 31             |
| 368  | NADH dehydrogenase subunit 5                                                              | 36212               | -      | 30             |
| 380  | NADH dehydrogenase subunit 4                                                              | 38240               | -      | 30             |
| 683  | heat-responsive protein 12                                                                | 4261                | -      | 30             |
| 768  | iron-sulfur cluster assembly enzyme isoform ISCU1                                         | 6991                | -      | 30             |

| ID   | Description                                                                                         | HomoloGene IDs      | PG     | Number of taxa |
|------|-----------------------------------------------------------------------------------------------------|---------------------|--------|----------------|
| 783  | small nuclear ribonucleoprotein polypeptide G                                                       | 37730, 82718        | -      | 30             |
| 801  | NADH-ubiquinone oxidoreductase Fe-S protein 7                                                       | 11535, 56989        | -      | 30             |
| 861  | hypothetical protein LOC746                                                                         | 40931               | -      | 30             |
| 895  | eukaryotic translation initiation factor 3, subunit 12                                              | 8292, 52710         | -      | 30             |
| 965  | 13kDa differentiation-associated protein                                                            | 10314               | -      | 30             |
| 1041 | NADH dehydrogenase (ubiquinone) 1 alpha subcomplex, 2, 8kDa                                         | 37628               | -      | 30             |
| 1046 | succinate dehydrogenase complex, subunit C precursor                                                | 2256                | -      | 30             |
| 1118 | hypothetical protein LOC55831                                                                       | 10201               | -      | 30             |
| 1162 | proteasome beta 1 subunit                                                                           | 2087                | psma-J | 29             |
| 1051 | actin related protein 2/3 complex subunit 4 isoform a                                               | 4177                | arc20  | 29             |
| 742  | t-complex-associated-testis-expressed 1-like                                                        | 21304, 4754         | -      | 29             |
| 893  | small nuclear ribonucleoprotein polypeptide D2                                                      | 3381, 77955, 76944  | -      | 29             |
| 906  | translocase of outer mitochondrial membrane 20 homolog                                              | 44649, 52617, 47747 | -      | 29             |
| 1012 | actin related protein 2/3 complex subunit 5                                                         | 4176, 36463, 52415  | -      | 29             |
| 1015 | eukaryotic translation initiation factor 3, subunit 4 delta                                         | 2784, 70155         | -      | 29             |
| 1165 | NADH dehydrogenase (ubiquinone) 1 alpha subcomplex, 5                                               | 3664                | -      | 29             |
| 1181 | hypothetical protein LOC51234                                                                       | 5879                | -      | 29             |
| 833  | proteasome beta 3 subunit                                                                           | 2089, 74663         | psma-I | 28             |
| 622  | electron transfer flavoprotein, alpha polypeptide                                                   | 100                 | -      | 28             |
| 793  | 15 kDa selenoprotein isoform 1 precursor                                                            | 3145                | -      | 28             |
| 916  | protein (peptidyl-prolyl cis/trans isomerase) NIMA-interacting 1                                    | 4531                | -      | 28             |
| 1020 | low molecular mass ubiquinone-binding protein                                                       | 40942, 44637        | -      | 28             |
| 1026 | esterase D/formylglutathione hydrolase                                                              | 55623               | -      | 28             |
| 1077 | ATP synthase, H <sup>+</sup> transporting, mitochondrial F0 complex, subunit F6 isoform a precursor | 1272, 43209         | -      | 28             |
| 1132 | NADH dehydrogenase (ubiquinone) 1 alpha subcomplex, 8, 19kDa                                        | 40932, 74890        | -      | 28             |
| 1170 | NADH dehydrogenase (ubiquinone) 1 beta subcomplex, 9, 22kDa                                         | 3669                | -      | 28             |
| 1292 | ATPase, H <sup>+</sup> transporting, lysosomal 21kDa, V0 subunit c                                  | 2986                | -      | 28             |
| 868  | proteasome beta 2 subunit                                                                           | 2088, 60427         | psma-H | 27             |

| ID   | Description                                                           | HomoloGene IDs      | PG    | Number of taxa |
|------|-----------------------------------------------------------------------|---------------------|-------|----------------|
| 1007 | F-actin capping protein beta subunit                                  | 3620                | -     | 27             |
| 1054 | stromal cell-derived factor 2 precursor                               | 5045, 11101         | -     | 27             |
| 1099 | ATPase, H <sup>+</sup> transporting, lysosomal 14kD, V1 subunit F     | 3119                | -     | 27             |
| 1121 | SF3b10                                                                | 41825               | -     | 27             |
| 1136 | NADH dehydrogenase (ubiquinone) 1 alpha subcomplex, 6                 | 1861                | -     | 27             |
| 1187 | prefoldin 4                                                           | 37645, 82938        | -     | 27             |
| 1200 | glycine cleavage system protein H (aminomethyl carrier)               | 12239, 67129        | -     | 27             |
| 1245 | inactive progesterone receptor, 23 kD                                 | 81751, 44698, 57061 | -     | 27             |
| 756  | adenosine kinase isoform b                                            | 4891, 51621         | -     | 26             |
| 1009 | growth hormone inducible transmembrane protein                        | 8667                | -     | 26             |
| 1013 | signal peptidase complex subunit 2 homolog                            | 8842, 72649, 55112  | -     | 26             |
| 1081 | NADH dehydrogenase (ubiquinone) 1 alpha subcomplex, 9, 39kDa          | 3666                | -     | 26             |
| 1129 | hypothetical protein LOC51398                                         | 13954               | -     | 26             |
| 1190 | elongin B isoform a                                                   | 38275, 52996        | -     | 26             |
| 1204 | prefoldin 5 isoform alpha                                             | 1972                | -     | 26             |
| 1294 | von Hippel-Lindau binding protein 1                                   | 2531                | -     | 26             |
| 1335 | signal peptidase complex subunit 3 homolog                            | 41454               | -     | 26             |
| 1381 | DNA directed RNA polymerase II polypeptide C                          | 2017                | -     | 26             |
| 1409 | NADH dehydrogenase (ubiquinone) 1 beta subcomplex, 5, 16kDa precursor | 31093, 81299        | -     | 26             |
| 1489 | programmed cell death 5                                               | 10506               | pace6 | 25             |
| 858  | NADH dehydrogenase (ubiquinone) 1, alpha/beta subcomplex, 1, 8kDa     | 80336               | -     | 25             |
| 930  | elongin C                                                             | 38083               | -     | 25             |
| 1047 | testis enhanced gene transcript (BAX inhibitor 1)                     | 2419                | -     | 25             |
| 1169 | B-cell receptor-associated protein 31                                 | 38095, 22411        | -     | 25             |
| 1244 | vacuolar protein sorting 29 isoform 2                                 | 9433                | -     | 25             |
| 1374 | Apg3p                                                                 | 6836                | -     | 25             |
| 1378 | chromosome 15 open reading frame 24                                   | 10597               | -     | 25             |
| 1646 | translocase of inner mitochondrial membrane 13                        | 40846               | -     | 25             |

**Supplementary Table 4 | Table of metrics relevant to the gene selection approach presented here for all genes used in two recent phylogenomic studies.** Gene- the name assigned to the gene in the previous study. Dataset- p designates genes considered by Philippe et al.<sup>9</sup>, r designates genes considered by Rokas et al.<sup>13</sup>, and r&p designates genes considered by both studies (homology across studies assessed by BLASTP with an e-value cutoff of  $1 \times 10^{-20}$  and shared ontology). Exemplar- the GenBank accession number for the sequence used as an Exemplar for each gene in BLASTP searches (usually the longest sequence in the original study). ID- the unique numerical identifier for each cluster generated by our gene selection approach. This ID corresponds to the ID indicated in Supplementary Table 3. If a gene from the previous studies had significant hits to multiple clusters from the present study, each cluster hit is shown on its own row.  $N_{seq}$ - number of sequences assigned to the cluster indicated by ID.  $N_{taxa}$ - number of taxa with sequences assigned to the cluster.  $N_{focal}$ - number of these taxa for which we collected new EST data. Mean- mean number of sequences per taxon in the cluster. Median- median number of sequences per taxon. Other- status of cluster according to other criteria. A dash indicates that there were no other problems or that the cluster was not evaluated for other problems because it failed according to taxon sampling, median, or mean. 1 indicates that features of the graph indicative of paralogy problems were noted (see Methods). 2 indicates that the cluster was evaluated phylogenetically and that the resulting topology indicated paralogy problems (see Methods). Pass- 1 indicates that the cluster passed all selection criteria and is one of the 150 genes included in our phylogenomic analysis.

| Gene            | Study | Exemplar    | ID   | $N_{seq}$ | $N_{taxa}$ | $N_{focal}$ | Mean | Median | Other | Pass |
|-----------------|-------|-------------|------|-----------|------------|-------------|------|--------|-------|------|
| <i>ar21</i>     | p     | NP_650498.2 | 805  | 45        | 38         | 6           | 1.18 | 1      | -     | 1    |
| <i>arc20</i>    | p     | EAA47728    | 1051 | 37        | 34         | 5           | 1.09 | 1      | -     | 1    |
| <i>arp23</i>    | p     | AAH02988.1  | 425  | 75        | 47         | 6           | 1.60 | 1      | 2     | 0    |
| <i>cct-A</i>    | p     | EAA08611    | 46   | 335       | 61         | 17          | 5.49 | 5      | -     | 0    |
| <i>cct-A</i>    | p     | EAA08611    | 295  | 98        | 30         | 2           | 3.27 | 2      | -     | 0    |
| <i>cct-E</i>    | p     | AAB39290    | 46   | 335       | 61         | 17          | 5.49 | 5      | -     | 0    |
| <i>cct-E</i>    | p     | AAB39290    | 295  | 98        | 30         | 2           | 3.27 | 2      | -     | 0    |
| <i>cct-G</i>    | p     | AAH06501    | 46   | 335       | 61         | 17          | 5.49 | 5      | -     | 0    |
| <i>cct-G</i>    | p     | AAH06501    | 295  | 98        | 30         | 2           | 3.27 | 2      | -     | 0    |
| <i>cct-N</i>    | p     | CAB08778    | 46   | 335       | 61         | 17          | 5.49 | 5      | -     | 0    |
| <i>cct-T</i>    | p     | CAA89300    | 46   | 335       | 61         | 17          | 5.49 | 5      | -     | 0    |
| <i>cct-T</i>    | p     | CAA89300    | 295  | 98        | 30         | 2           | 3.27 | 2      | -     | 0    |
| <i>cct-Z</i>    | p     | CAA86694    | 46   | 335       | 61         | 17          | 5.49 | 5      | -     | 0    |
| <i>cpn60-mt</i> | p     | AAN71181    | 567  | 60        | 36         | 5           | 1.67 | 1.5    | -     | 0    |
| <i>crfg</i>     | p     | AAK39281    | 595  | 58        | 35         | 4           | 1.66 | 1      | -     | 0    |
| <i>ef2-U5</i>   | p     | CAA82015    | 76   | 232       | 58         | 10          | 4.00 | 3      | -     | 0    |
| <i>ef5a</i>     | p     | CAE65142    | 352  | 88        | 54         | 15          | 1.63 | 1      | -     | 1    |
| <i>fibri</i>    | p     | Q22053      | 883  | 42        | 28         | 1           | 1.50 | 1      | -     | 0    |
| <i>fpps</i>     | p     | CAA08918    | 1949 | 24        | 23         | 3           | 1.04 | 1      | -     | 0    |
| <i>gln</i>      | p     | AAL78196    | 4926 | 10        | 8          | 0           | 1.25 | 1      | -     | 0    |
| <i>ifla</i>     | p     | AAK29845    | 696  | 50        | 42         | 9           | 1.19 | 1      | -     | 1    |



| Gene          | Study | Exemplar    | ID   | N <sub>seq</sub> | N <sub>taxa</sub> | N <sub>focal</sub> | Mean | Median | Other | Pass |
|---------------|-------|-------------|------|------------------|-------------------|--------------------|------|--------|-------|------|
| <i>if2b</i>   | p     | EAA04210    | 1138 | 35               | 33                | 4                  | 1.06 | 1      | -     | 0    |
| <i>if2p</i>   | p     | O60841      | 1770 | 26               | 18                | 0                  | 1.44 | 1      | -     | 0    |
| <i>if2p</i>   | p     | O60841      | 2241 | 22               | 17                | 0                  | 1.29 | 1      | -     | 0    |
| <i>if6</i>    | p     | EAA01111    | 1226 | 33               | 31                | 4                  | 1.06 | 1      | -     | 0    |
| <i>l12e-A</i> | p     | CAA61806.1  | 225  | 112              | 73                | 26                 | 1.53 | 1      | -     | 1    |
| <i>l12e-B</i> | p     | EAA52871    | 365  | 84               | 51                | 15                 | 1.65 | 2      | -     | 0    |
| <i>l12e-C</i> | p     | AAH50495    | 365  | 84               | 51                | 15                 | 1.65 | 2      | -     | 0    |
| <i>l12e-D</i> | p     | EAA11704    | 169  | 133              | 72                | 24                 | 1.85 | 1      | -     | 1    |
| <i>mcm-A</i>  | p     | XP_226316   | 303  | 97               | 33                | 4                  | 2.94 | 2      | -     | 0    |
| <i>mcm-A</i>  | p     | XP_226316   | 308  | 96               | 26                | 0                  | 3.69 | 2      | -     | 0    |
| <i>mcm-B</i>  | p     | BAA04642    | 303  | 97               | 33                | 4                  | 2.94 | 2      | -     | 0    |
| <i>mcm-B</i>  | p     | BAA04642    | 308  | 96               | 26                | 0                  | 3.69 | 2      | -     | 0    |
| <i>metk</i>   | p     | AAN10507    | 428  | 75               | 50                | 7                  | 1.50 | 1      | 2     | 0    |
| <i>mra1</i>   | p     | CAA92394    | 1491 | 29               | 24                | 1                  | 1.21 | 1      | -     | 0    |
| <i>nsf1-C</i> | p     | XP_341108   | 29   | 436              | 59                | 15                 | 7.39 | 5      | -     | 0    |
| <i>nsf1-C</i> | p     | XP_341108   | 63   | 264              | 46                | 7                  | 5.74 | 3      | -     | 0    |
| <i>nsf1-E</i> | p     | EAA13918    | 29   | 436              | 59                | 15                 | 7.39 | 5      | -     | 0    |
| <i>nsf1-E</i> | p     | EAA13918    | 63   | 264              | 46                | 7                  | 5.74 | 3      | -     | 0    |
| <i>nsf1-G</i> | p     | AAM48537    | 29   | 436              | 59                | 15                 | 7.39 | 5      | -     | 0    |
| <i>nsf1-G</i> | p     | AAM48537    | 63   | 264              | 46                | 7                  | 5.74 | 3      | -     | 0    |
| <i>nsf1-H</i> | p     | EAA49954    | 29   | 436              | 59                | 15                 | 7.39 | 5      | -     | 0    |
| <i>nsf1-I</i> | p     | BAC36516    | 29   | 436              | 59                | 15                 | 7.39 | 5      | -     | 0    |
| <i>nsf1-I</i> | p     | BAC36516    | 63   | 264              | 46                | 7                  | 5.74 | 3      | -     | 0    |
| <i>nsf1-J</i> | p     | EAA01092    | 29   | 436              | 59                | 15                 | 7.39 | 5      | -     | 0    |
| <i>nsf1-J</i> | p     | EAA01092    | 63   | 264              | 46                | 7                  | 5.74 | 3      | -     | 0    |
| <i>nsf1-K</i> | p     | AAH08713    | 29   | 436              | 59                | 15                 | 7.39 | 5      | -     | 0    |
| <i>nsf1-K</i> | p     | AAH08713    | 63   | 264              | 46                | 7                  | 5.74 | 3      | -     | 0    |
| <i>nsf1-L</i> | p     | NP_010682.1 | 29   | 436              | 59                | 15                 | 7.39 | 5      | -     | 0    |
| <i>nsf1-L</i> | p     | NP_010682.1 | 63   | 264              | 46                | 7                  | 5.74 | 3      | -     | 0    |
| <i>nsf1-M</i> | p     | EAA54685    | 29   | 436              | 59                | 15                 | 7.39 | 5      | -     | 0    |
| <i>nsf1-M</i> | p     | EAA54685    | 63   | 264              | 46                | 7                  | 5.74 | 3      | -     | 0    |
| <i>nsf2-A</i> | p     | CAA40276    | 29   | 436              | 59                | 15                 | 7.39 | 5      | -     | 0    |
| <i>nsf2-A</i> | p     | CAA40276    | 63   | 264              | 46                | 7                  | 5.74 | 3      | -     | 0    |
| <i>nsf2-F</i> | p     | EAA27598    | 29   | 436              | 59                | 15                 | 7.39 | 5      | -     | 0    |
| <i>nsf2-F</i> | p     | EAA27598    | 63   | 264              | 46                | 7                  | 5.74 | 3      | -     | 0    |
| <i>orf2</i>   | p     | NP_496099   | 2420 | 20               | 18                | 7                  | 1.11 | 1      | -     | 0    |
| <i>pace4</i>  | p     | CAE73168    | 2155 | 22               | 21                | 1                  | 1.05 | 1      | -     | 0    |
| <i>pace6</i>  | p     | CAA88799    | 1489 | 29               | 28                | 6                  | 1.04 | 1      | -     | 1    |
| <i>psma-A</i> | p     | CAA67615    | 64   | 258              | 66                | 15                 | 3.91 | 3      | -     | 0    |
| <i>psma-A</i> | p     | CAA67615    | 73   | 240              | 59                | 16                 | 4.07 | 3      | -     | 0    |
| <i>psma-A</i> | p     | CAA67615    | 2252 | 22               | 10                | 1                  | 2.20 | 2      | -     | 0    |
| <i>psma-B</i> | p     | EAA28095    | 73   | 240              | 59                | 16                 | 4.07 | 3      | -     | 0    |

| Gene           | Study | Exemplar    | ID   | N <sub>seq</sub> | N <sub>taxa</sub> | N <sub>focal</sub> | Mean | Median | Other | Pass |
|----------------|-------|-------------|------|------------------|-------------------|--------------------|------|--------|-------|------|
| <i>psma-C</i>  | p     | AAL89878    | 73   | 240              | 59                | 16                 | 4.07 | 3      | -     | 0    |
| <i>psma-C</i>  | p     | AAL89878    | 447  | 73               | 24                | 1                  | 3.04 | 2      | -     | 0    |
| <i>psma-D</i>  | p     | EAA56810    | 73   | 240              | 59                | 16                 | 4.07 | 3      | -     | 0    |
| <i>psma-E</i>  | p     | AAN63095    | 73   | 240              | 59                | 16                 | 4.07 | 3      | -     | 0    |
| <i>psma-E</i>  | p     | AAN63095    | 2252 | 22               | 10                | 1                  | 2.20 | 2      | -     | 0    |
| <i>psma-F</i>  | p     | EAA53450    | 73   | 240              | 59                | 16                 | 4.07 | 3      | -     | 0    |
| <i>psma-F</i>  | p     | EAA53450    | 447  | 73               | 24                | 1                  | 3.04 | 2      | -     | 0    |
| <i>psma-F</i>  | p     | EAA53450    | 2252 | 22               | 10                | 1                  | 2.20 | 2      | -     | 0    |
| <i>psma-G</i>  | p     | EAA13600    | 73   | 240              | 59                | 16                 | 4.07 | 3      | -     | 0    |
| <i>psma-G</i>  | p     | EAA13600    | 447  | 73               | 24                | 1                  | 3.04 | 2      | -     | 0    |
| <i>psma-G</i>  | p     | EAA13600    | 2252 | 22               | 10                | 1                  | 2.20 | 2      | -     | 0    |
| <i>psma-H</i>  | p     | XP_569789.1 | 868  | 42               | 35                | 5                  | 1.20 | 1      | -     | 1    |
| <i>psma-I</i>  | p     | NP_649858.1 | 833  | 44               | 36                | 6                  | 1.22 | 1      | -     | 1    |
| <i>psma-J</i>  | p     | NP_498806.1 | 1162 | 34               | 33                | 8                  | 1.03 | 1      | -     | 1    |
| <i>psmb-K</i>  | p     | AAF52066    | 264  | 103              | 55                | 14                 | 1.87 | 1      | 2     | 0    |
| <i>psmb-L</i>  | p     | EAA28906    | 264  | 103              | 55                | 14                 | 1.87 | 1      | 2     | 0    |
| <i>psmb-M</i>  | p     | AAF46978    | 264  | 103              | 55                | 14                 | 1.87 | 1      | 2     | 0    |
| <i>psmb-M</i>  | p     | AAF46978    | 667  | 53               | 38                | 5                  | 1.39 | 1      | 2     | 0    |
| <i>psmb-N</i>  | p     | NP_649529.1 | 703  | 50               | 41                | 5                  | 1.22 | 1      | -     | 1    |
| <i>rad23</i>   | p     | AAH27747    | 766  | 47               | 37                | 5                  | 1.27 | 1      | -     | 1    |
| <i>rad51-A</i> | p     | AAB64650    | 1438 | 30               | 20                | 3                  | 1.50 | 1      | -     | 0    |
| <i>rfl</i>     | p     | AAM46702    | 1902 | 24               | 20                | 1                  | 1.20 | 1      | -     | 0    |
| <i>rfl</i>     | p     | AAM46702    | 6389 | 7                | 6                 | 0                  | 1.17 | 1      | -     | 0    |
| <i>rla2-B</i>  | p     | AAH58685    | 226  | 112              | 72                | 26                 | 1.56 | 1      | -     | 1    |
| <i>rpl1</i>    | p     | EAA05156    | 113  | 179              | 74                | 23                 | 2.42 | 1      | 2     | 0    |
| <i>rpl12b</i>  | p     | EAA13967    | 213  | 115              | 71                | 24                 | 1.62 | 1      | -     | 1    |
| <i>rpl13</i>   | p     | AAK92155    | 101  | 188              | 70                | 21                 | 2.69 | 1      | -     | 0    |
| <i>rpl14a</i>  | p     | XP_224414   | 325  | 92               | 70                | 22                 | 1.31 | 1      | -     | 1    |
| <i>rpl15a</i>  | p     | EAA10485    | 103  | 186              | 69                | 23                 | 2.70 | 1      | -     | 0    |
| <i>rpl15a</i>  | p     | EAA10485    | 2132 | 22               | 17                | 2                  | 1.29 | 1      | -     | 0    |
| <i>rpl16b</i>  | p     | EAA14246    | 191  | 121              | 73                | 22                 | 1.66 | 1      | 1     | 0    |
| <i>rpl17</i>   | p     | EAA32243    | 200  | 118              | 74                | 26                 | 1.59 | 1      | -     | 1    |
| <i>rpl18</i>   | p     | EAA04761    | 179  | 128              | 71                | 23                 | 1.80 | 1      | -     | 1    |
| <i>rpl19a</i>  | p     | EAA09119    | 174  | 130              | 62                | 18                 | 2.10 | 1      | -     | 1    |
| <i>rpl2</i>    | p     | AAD47076.1  | 184  | 124              | 76                | 23                 | 1.63 | 1      | -     | 1    |
| <i>rpl20</i>   | p     | AAB92041    | 232  | 110              | 73                | 23                 | 1.51 | 1      | -     | 1    |
| <i>rpl21</i>   | p     | EAA00465    | 298  | 97               | 64                | 22                 | 1.52 | 1      | 1     | 0    |
| <i>rpl22</i>   | p     | AAF46972    | 233  | 110              | 69                | 25                 | 1.59 | 1      | -     | 1    |
| <i>rpl23a</i>  | p     | AAH49038    | 235  | 109              | 70                | 25                 | 1.56 | 1      | -     | 1    |
| <i>rpl24-A</i> | p     | AAK18907    | 160  | 138              | 71                | 25                 | 1.94 | 2      | -     | 0    |
| <i>rpl24-B</i> | p     | EAA32763    | 160  | 138              | 71                | 25                 | 1.94 | 2      | -     | 0    |
| <i>rpl25</i>   | p     | EAA11004    | 331  | 91               | 65                | 21                 | 1.40 | 1      | 1     | 0    |

| Gene          | Study | Exemplar           | ID   | N <sub>seq</sub> | N <sub>taxa</sub> | N <sub>focal</sub> | Mean | Median | Other | Pass |
|---------------|-------|--------------------|------|------------------|-------------------|--------------------|------|--------|-------|------|
| <i>rpl26</i>  | p     | CAD37159           | 279  | 100              | 71                | 25                 | 1.41 | 1      | -     | 1    |
| <i>rpl27</i>  | p     | EAA00079           | 193  | 120              | 69                | 23                 | 1.74 | 1      | -     | 1    |
| <i>rpl30</i>  | p     | AAH62278           | 345  | 89               | 63                | 23                 | 1.41 | 1      | -     | 1    |
| <i>rpl31</i>  | p     | EAA00150           | 389  | 80               | 60                | 22                 | 1.33 | 1      | 1     | 0    |
| <i>rpl32</i>  | p     | AAN14210           | 313  | 95               | 69                | 25                 | 1.38 | 1      | 1     | 0    |
| <i>rpl33a</i> | p     | AAK92169           | 268  | 102              | 73                | 25                 | 1.40 | 1      | -     | 1    |
| <i>rpl34</i>  | p     | AAN13422           | 356  | 86               | 64                | 25                 | 1.34 | 1      | -     | 1    |
| <i>rpl35</i>  | p     | XP_965481.1        | 305  | 96               | 70                | 24                 | 1.37 | 1      | -     | 1    |
| <i>rpl37a</i> | p     | AAL99981           | 241  | 108              | 71                | 26                 | 1.52 | 1      | -     | 1    |
| <i>rpl39</i>  | p     | AAR10259           | 316  | 94               | 60                | 23                 | 1.57 | 1      | 1     | 0    |
| <i>rpl42</i>  | p     | AAB68420           | 277  | 100              | 65                | 24                 | 1.54 | 1      | 2     | 0    |
| <i>rpl4B</i>  | p     | BAB79458           | 128  | 163              | 69                | 20                 | 2.36 | 1      | 2     | 0    |
| <i>rpl6</i>   | p     | CAA60588.1         | 107  | 182              | 73                | 23                 | 2.49 | 1      | 2     | 0    |
| <i>rpl7-A</i> | p     | EAA14847           | 95   | 192              | 77                | 23                 | 2.49 | 1      | 2     | 0    |
| <i>rpl9</i>   | p     | EAA51069           | 143  | 149              | 79                | 28                 | 1.89 | 1      | -     | 1    |
| <i>rps1</i>   | p     | EAA08803           | 97   | 190              | 76                | 24                 | 2.50 | 1      | 2     | 0    |
| <i>rps10</i>  | p     | EAA49455           | 140  | 152              | 75                | 27                 | 2.03 | 1      | 1     | 0    |
| <i>rps11</i>  | p     | EAA52085           | 273  | 101              | 71                | 26                 | 1.42 | 1      | -     | 1    |
| <i>rps13a</i> | p     | AAN52387           | 272  | 101              | 73                | 24                 | 1.38 | 1      | -     | 1    |
| <i>rps14</i>  | p     | EAA06897           | 145  | 148              | 75                | 24                 | 1.97 | 1      | 2     | 0    |
| <i>rps15</i>  | p     | EAA01741           | 199  | 118              | 76                | 27                 | 1.55 | 1      | -     | 1    |
| <i>rps16</i>  | p     | AAL26583           | 242  | 108              | 76                | 26                 | 1.42 | 1      | -     | 1    |
| <i>rps17</i>  | p     | EAA50355           | 299  | 97               | 73                | 24                 | 1.33 | 1      | -     | 1    |
| <i>rps18</i>  | p     | EAA54870           | 211  | 115              | 75                | 26                 | 1.53 | 1      | -     | 1    |
| <i>rps19</i>  | p     | EAA05616           | 260  | 104              | 72                | 25                 | 1.44 | 1      | -     | 1    |
| <i>rps20</i>  | p     | EAA51777           | 236  | 109              | 72                | 25                 | 1.51 | 1      | -     | 1    |
| <i>rps22a</i> | p     | AAH51205           | 278  | 100              | 70                | 24                 | 1.43 | 1      | 1     | 0    |
| <i>rps23</i>  | p     | EAA01135           | 115  | 177              | 81                | 27                 | 2.19 | 1      | 2     | 0    |
| <i>rps25</i>  | p     | XP_236606          | 288  | 99               | 69                | 24                 | 1.43 | 1      | -     | 1    |
| <i>rps26</i>  | p     | CAB57819           | 346  | 89               | 59                | 24                 | 1.51 | 1      | 1     | 0    |
| <i>rps27</i>  | p     | CAC44218           | 287  | 99               | 71                | 27                 | 1.39 | 1      | -     | 1    |
| <i>rps28a</i> | p     | XP_344014          | 321  | 93               | 61                | 27                 | 1.52 | 1      | -     | 1    |
| <i>rps29</i>  | p     | AAL68340           | 355  | 86               | 67                | 24                 | 1.28 | 1      | -     | 1    |
| <i>rps4</i>   | p     | AAP06482           | 72   | 241              | 73                | 22                 | 3.30 | 1      | -     | 0    |
| <i>rps5</i>   | p     | XP_341789          | 116  | 177              | 72                | 22                 | 2.46 | 1      | 2     | 0    |
| <i>rps6</i>   | p     | EAA07587           | 104  | 185              | 66                | 19                 | 2.80 | 1      | -     | 0    |
| <i>sap40</i>  | p     | XP_00117792<br>4.1 | 147  | 146              | 63                | 18                 | 2.32 | 1      | 1     | 0    |
| <i>sra</i>    | p     | EAA47420           | 1233 | 33               | 25                | 1                  | 1.32 | 1      | -     | 0    |
| <i>sra</i>    | p     | EAA47420           | 1439 | 30               | 24                | 3                  | 1.25 | 1      | -     | 0    |
| <i>srp54</i>  | p     | AAB68136           | 1233 | 33               | 25                | 1                  | 1.32 | 1      | -     | 0    |
| <i>srp54</i>  | p     | AAB68136           | 1439 | 30               | 24                | 3                  | 1.25 | 1      | -     | 0    |

| Gene                                                    | Study | Exemplar   | ID   | N <sub>seq</sub> | N <sub>taxa</sub> | N <sub>focal</sub> | Mean | Median | Other | Pass |
|---------------------------------------------------------|-------|------------|------|------------------|-------------------|--------------------|------|--------|-------|------|
| <i>srs</i>                                              | p     | AAH00716   | 574  | 59               | 39                | 8                  | 1.51 | 1      | 2     | 0    |
| <i>suca</i>                                             | p     | EAA54949   | 744  | 48               | 26                | 1                  | 1.85 | 2      | -     | 0    |
| <i>suca</i>                                             | p     | EAA54949   | 838  | 44               | 33                | 4                  | 1.33 | 1      | -     | 0    |
| <i>tfiid</i>                                            | p     | CAE64435   | 1176 | 34               | 22                | 0                  | 1.55 | 1      | -     | 0    |
| <i>topo1</i>                                            | p     | EAA05377   | 1651 | 27               | 16                | 0                  | 1.69 | 1      | -     | 0    |
| <i>topo1</i>                                            | p     | EAA05377   | 5484 | 9                | 7                 | 0                  | 1.29 | 1      | -     | 0    |
| <i>vata</i>                                             | p     | NP_609595  | 275  | 101              | 51                | 7                  | 1.98 | 2      | -     | 0    |
| <i>vata</i>                                             | p     | NP_609595  | 561  | 61               | 35                | 4                  | 1.74 | 1      | -     | 0    |
| <i>vata</i>                                             | p     | NP_609595  | 970  | 39               | 25                | 1                  | 1.56 | 1      | -     | 0    |
| <i>vatb</i>                                             | p     | EAA08175   | 275  | 101              | 51                | 7                  | 1.98 | 2      | -     | 0    |
| <i>vatb</i>                                             | p     | EAA08175   | 458  | 71               | 43                | 8                  | 1.65 | 1      | 2     | 0    |
| <i>vatb</i>                                             | p     | EAA08175   | 561  | 61               | 35                | 4                  | 1.74 | 1      | -     | 0    |
| <i>vate</i>                                             | p     | AAH56636   | 1529 | 28               | 27                | 1                  | 1.04 | 1      | -     | 0    |
| <i>vate</i>                                             | p     | AAA35209   | 753  | 48               | 35                | 3                  | 1.37 | 1      | -     | 0    |
| <i>w09c</i>                                             | p     | EAA43915   | 624  | 56               | 36                | 5                  | 1.56 | 1      | 2     | 0    |
| <i>wrs</i>                                              | p     | BAB23357   | 1011 | 38               | 29                | 3                  | 1.31 | 1      | -     | 0    |
| <i>xpb</i>                                              | p     | EAA28093   | 2953 | 17               | 14                | 1                  | 1.21 | 1      | -     | 0    |
| <i>yif1p</i>                                            | p     | AAF56617   | 3366 | 15               | 15                | 0                  | 1.00 | 1      | -     | 0    |
| <i>chaperonin complex component TCP-1 beta subunit</i>  | r&p   | ABB29711.1 | 46   | 335              | 61                | 17                 | 5.49 | 5      | -     | 0    |
| <i>chaperonin complex component TCP-1 beta subunit</i>  | r&p   | ABB29711.1 | 295  | 98               | 30                | 2                  | 3.27 | 2      | -     | 0    |
| <i>chaperonin complex component TCP-1 delta subunit</i> | r&p   | ABB29710.1 | 46   | 335              | 61                | 17                 | 5.49 | 5      | -     | 0    |
| <i>chaperonin complex component TCP-1 delta subunit</i> | r&p   | ABB29710.1 | 295  | 98               | 30                | 2                  | 3.27 | 2      | -     | 0    |
| <i>DNA-directed RNA polymerase II largest subunit</i>   | r&p   | ABB29696.1 | 354  | 87               | 19                | 2                  | 4.58 | 2      | -     | 0    |
| <i>DNA-directed RNA polymerase II largest subunit</i>   | r&p   | ABB29696.1 | 760  | 48               | 16                | 1                  | 3.00 | 2.5    | -     | 0    |
| <i>elongation factor-2</i>                              | r&p   | ABB29633.1 | 76   | 232              | 58                | 10                 | 4.00 | 3      | -     | 0    |
| <i>endoplasmic reticulum heat shock 70 kDa protein</i>  | r&p   | ABB29693.1 | 23   | 494              | 62                | 14                 | 7.97 | 4      | -     | 0    |
| <i>endoplasmic reticulum heat shock 70 kDa protein</i>  | r&p   | ABB29693.1 | 349  | 89               | 22                | 1                  | 4.05 | 1.5    | -     | 0    |
| <i>eukaryotic translation initiation factor 2</i>       | r&p   | ABB29716.1 | 1414 | 30               | 24                | 3                  | 1.25 | 1      | -     | 0    |

| Gene                                                      | Study | Exemplar   | ID   | N <sub>seq</sub> | N <sub>taxa</sub> | N <sub>focal</sub> | Mean  | Median | Other | Pass |
|-----------------------------------------------------------|-------|------------|------|------------------|-------------------|--------------------|-------|--------|-------|------|
| <i>eukaryotic translation initiation factor 2</i>         | r&p   | ABB29716.1 | 2190 | 22               | 15                | 0                  | 1.47  | 1      | -     | 0    |
| <i>mitochondrial heat shock 70 kDa protein</i>            | r&p   | ABB29640.1 | 23   | 494              | 62                | 14                 | 7.97  | 4      | -     | 0    |
| <i>ribosomal protein 10 large subunit</i>                 | r&p   | ABB29718.1 | 78   | 218              | 75                | 24                 | 2.91  | 1      | -     | 0    |
| <i>ribosomal protein 11 large subunit</i>                 | r&p   | ABB29719.1 | 185  | 123              | 74                | 24                 | 1.66  | 1      | 1     | 0    |
| <i>ribosomal protein 2 small subunit</i>                  | r&p   | ABB29724.1 | 137  | 154              | 68                | 23                 | 2.26  | 1      | 1     | 0    |
| <i>ribosomal protein 2 small subunit</i>                  | r&p   | ABB29724.1 | 725  | 49               | 27                | 2                  | 1.81  | 1      | -     | 0    |
| <i>ribosomal protein 3 large subunit</i>                  | r&p   | ABB29720.1 | 156  | 139              | 72                | 18                 | 1.93  | 1      | -     | 1    |
| <i>ribosomal protein 3 small subunit</i>                  | r&p   | ABB29725.1 | 84   | 210              | 77                | 24                 | 2.73  | 1      | -     | 0    |
| <i>ribosomal protein 5 large subunit</i>                  | r&p   | ABB29721.1 | 100  | 188              | 75                | 21                 | 2.51  | 1      | -     | 0    |
| <i>ribosomal protein 8 small subunit</i>                  | r&p   | ABB29726.1 | 186  | 123              | 75                | 21                 | 1.64  | 1      | -     | 1    |
| <i>ribosomal protein P0 large subunit</i>                 | r&p   | ABB29594.1 | 91   | 202              | 70                | 22                 | 2.89  | 1      | -     | 0    |
| <i>RNA polymerase I large subunit</i>                     | r&p   | ABB29704.1 | 760  | 48               | 16                | 1                  | 3.00  | 2.5    | -     | 0    |
| <i>actin-related protein Arp2 3 complex subunit ARPC2</i> | r     | ABB29728.1 | 1207 | 34               | 29                | 1                  | 1.17  | 1      | -     | 0    |
| <i>alpha-tubulin</i>                                      | r     | ABB29581.1 | 6    | 876              | 74                | 24                 | 11.84 | 6      | -     | 0    |
| <i>ATPase alpha-subunit</i>                               | r     | ABB29609.1 | 99   | 189              | 39                | 2                  | 4.85  | 3      | -     | 0    |
| <i>beta-tubulin</i>                                       | r     | ABB29632.1 | 6    | 876              | 74                | 24                 | 11.84 | 6      | -     | 0    |
| <i>cell division control protein 42</i>                   | r     | ABB29714.1 | 1    | 1247             | 70                | 22                 | 17.81 | 10     | -     | 0    |
| <i>cytoplasmic heat shock 70 kDa protein</i>              | r     | ABB29617.1 | 23   | 494              | 62                | 14                 | 7.97  | 4      | -     | 0    |
| <i>cytoplasmic heat shock 70 kDa protein</i>              | r     | ABB29617.1 | 7802 | 4                | 4                 | 0                  | 1.00  | 1      | -     | 0    |
| <i>DNA replication licensing factor MCM3 component</i>    | r     | ABB29658.1 | 303  | 97               | 33                | 4                  | 2.94  | 2      | -     | 0    |
| <i>DNA replication licensing factor MCM3 component</i>    | r     | ABB29658.1 | 308  | 96               | 26                | 0                  | 3.69  | 2      | -     | 0    |
| <i>DNA replication licensing factor MCM7 component</i>    | r     | ABB29709.1 | 303  | 97               | 33                | 4                  | 2.94  | 2      | -     | 0    |
| <i>DNA replication licensing factor MCM7 component</i>    | r     | ABB29709.1 | 308  | 96               | 26                | 0                  | 3.69  | 2      | -     | 0    |

| Gene                                                                                      | Study | Exemplar   | ID   | N <sub>seq</sub> | N <sub>taxa</sub> | N <sub>focal</sub> | Mean  | Median | Other | Pass |
|-------------------------------------------------------------------------------------------|-------|------------|------|------------------|-------------------|--------------------|-------|--------|-------|------|
| <i>gamma-glutamylcysteine synthetase</i>                                                  | r     | ABB29599.1 | 1627 | 27               | 18                | 0                  | 1.50  | 1      | -     | 0    |
| <i>glutamyl-tRNA synthetase</i>                                                           | r     | ABB29702.1 | 626  | 56               | 32                | 3                  | 1.75  | 1.5    | -     | 0    |
| <i>glutamyl-tRNA synthetase</i>                                                           | r     | ABB29702.1 | 1355 | 31               | 24                | 0                  | 1.29  | 1      | -     | 0    |
| <i>Gpi-anchor transamidase</i>                                                            | r     | ABB29607.1 | 2513 | 20               | 18                | 1                  | 1.11  | 1      | -     | 0    |
| <i>heat shock 90 kDa protein</i>                                                          | r     | ABB29634.1 | 64   | 258              | 66                | 15                 | 3.91  | 3      | -     | 0    |
| <i>methylthioadenosine phosphorylase MTAP</i>                                             | r     | ABB29729.1 | 1951 | 24               | 22                | 1                  | 1.09  | 1      | -     | 0    |
| <i>phenylalanyl-tRNA synthetase beta subunit</i>                                          | r     | ABB29732.1 | 1503 | 29               | 22                | 2                  | 1.32  | 1      | -     | 0    |
| <i>P-type ATPase</i>                                                                      | r     | ABB29630.1 | 1135 | 35               | 17                | 0                  | 2.06  | 2      | -     | 0    |
| <i>putative metalloprotease</i>                                                           | r     | ABB29660.1 | 1542 | 28               | 19                | 0                  | 1.47  | 1      | -     | 0    |
| <i>pyruvate carboxylase</i>                                                               | r     | ABB29597.1 | 466  | 71               | 23                | 1                  | 3.09  | 3      | -     | 0    |
| <i>pyruvate carboxylase</i>                                                               | r     | ABB29597.1 | 472  | 70               | 31                | 2                  | 2.26  | 1      | -     | 0    |
| <i>Ras-related nuclear protein</i>                                                        | r     | ABB29715.1 | 1    | 1247             | 70                | 22                 | 17.81 | 10     | -     | 0    |
| <i>Ras-related nuclear protein</i>                                                        | r     | ABB29715.1 | 31   | 422              | 30                | 4                  | 14.07 | 2      | -     | 0    |
| <i>ribosomal protein 8 large subunit</i>                                                  | r     | ABB29722.1 | 184  | 124              | 76                | 23                 | 1.63  | 1      | -     | 1    |
| <i>RNA polymerase I second largest subunit</i>                                            | r     | ABB29657.1 | 578  | 59               | 22                | 1                  | 2.68  | 2      | -     | 0    |
| <i>RNA polymerase I second largest subunit</i>                                            | r     | ABB29657.1 | 2461 | 20               | 10                | 0                  | 2.00  | 2      | -     | 0    |
| <i>RNA polymerase II transcription initiation nucleotide excision repair factor TFIIH</i> | r     | ABB29708.1 | 1021 | 38               | 18                | 2                  | 2.11  | 1      | -     | 0    |
| <i>RNA polymerase II transcription initiation nucleotide excision repair factor TFIIH</i> | r     | ABB29708.1 | 3502 | 15               | 10                | 0                  | 1.50  | 1      | -     | 0    |
| <i>RNA polymerase III large subunit</i>                                                   | r     | ABB29654.1 | 354  | 87               | 19                | 2                  | 4.58  | 2      | -     | 0    |
| <i>RNA polymerase III large subunit</i>                                                   | r     | ABB29654.1 | 760  | 48               | 16                | 1                  | 3.00  | 2.5    | -     | 0    |
| <i>RNA polymerase III second largest subunit</i>                                          | r     | ABB29628.1 | 578  | 59               | 22                | 1                  | 2.68  | 2      | -     | 0    |
| <i>RNA polymerase III second largest subunit</i>                                          | r     | ABB29628.1 | 2461 | 20               | 10                | 0                  | 2.00  | 2      | -     | 0    |

| Gene                                                               | Study | Exemplar   | ID   | N <sub>seq</sub> | N <sub>taxa</sub> | N <sub>focal</sub> | Mean | Median | Other | Pass |
|--------------------------------------------------------------------|-------|------------|------|------------------|-------------------|--------------------|------|--------|-------|------|
| <i>SNF2 family DNA-dependent ATPase domain-containing protein</i>  | r     | ABB29652.1 | 62   | 265              | 37                | 4                  | 7.16 | 2      | -     | 0    |
| <i>SNF2 family DNA-dependent ATPase domain-containing protein</i>  | r     | ABB29652.1 | 111  | 180              | 27                | 2                  | 6.67 | 2      | -     | 0    |
| <i>splicing factor 3b subunit 1</i>                                | r     | ABB29653.1 | 1231 | 33               | 25                | 0                  | 1.32 | 1      | -     | 0    |
| <i>succinate dehydrogenase iron-sulfur protein</i>                 | r     | ABB29717.1 | 705  | 50               | 39                | 4                  | 1.28 | 1      | -     | 0    |
| <i>SWI SNF-related matrix-associated regulator of chromatin a5</i> | r     | ABB29626.1 | 62   | 265              | 37                | 4                  | 7.16 | 2      | -     | 0    |

## Supplementary Figures

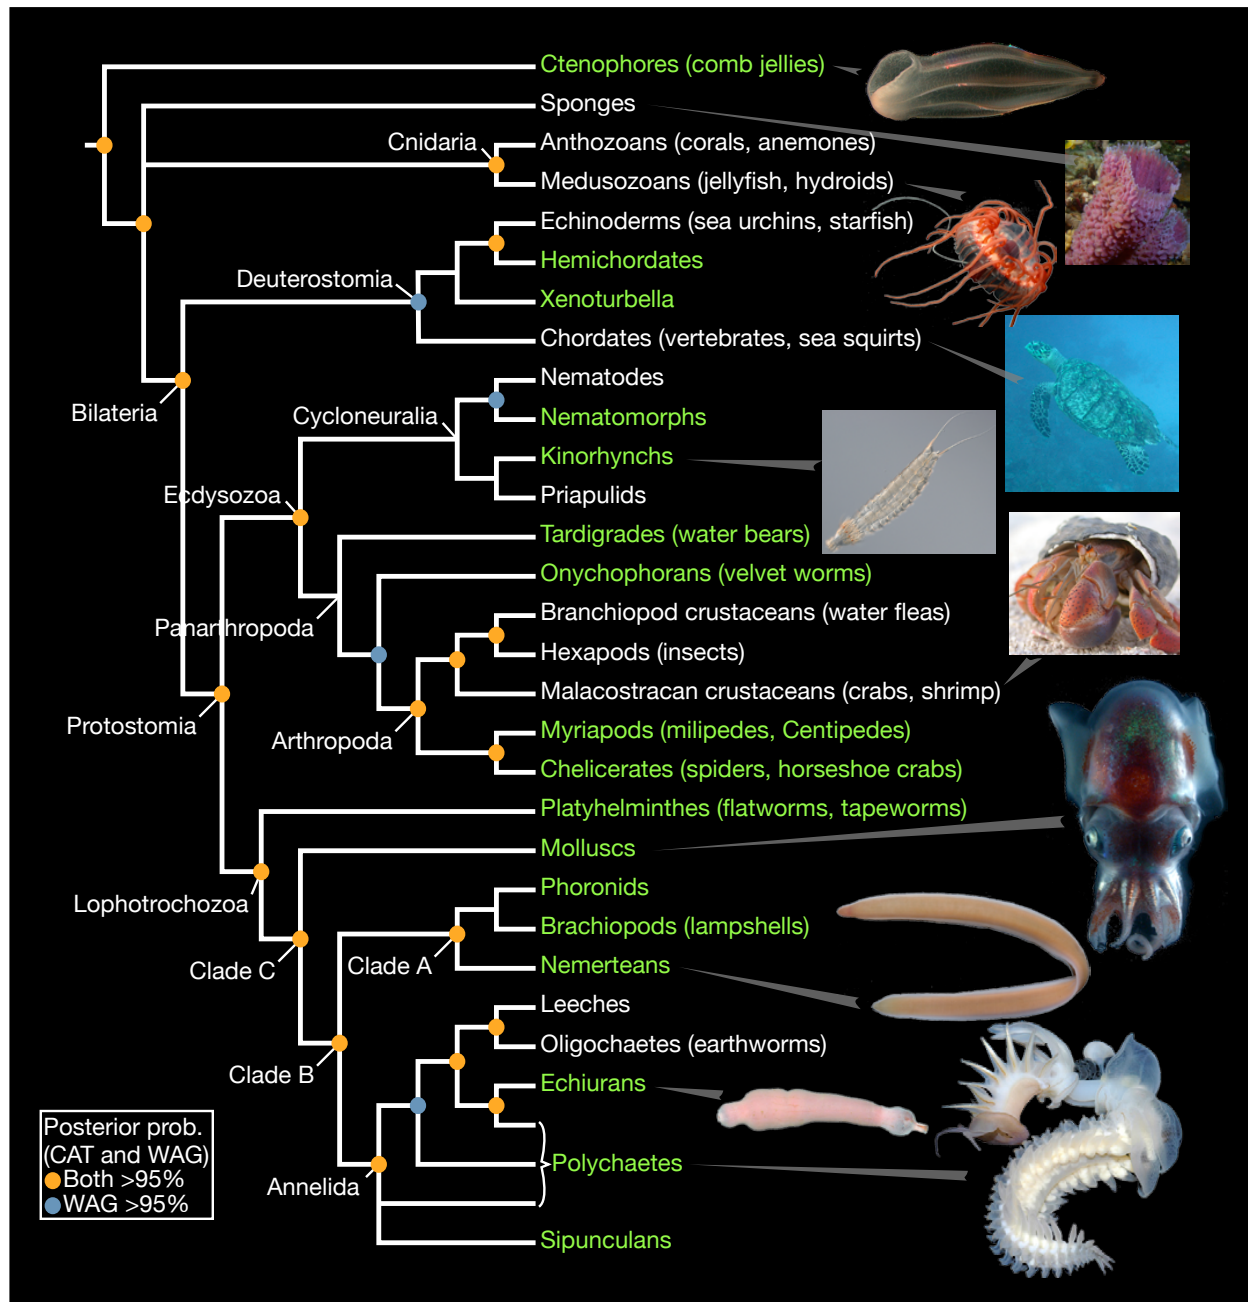

**Supplementary Figure 1 | Summary of major findings—the evolutionary relationships among animals as inferred in the present study.** Based on Fig. 2, with several clades collapsed for clarity.



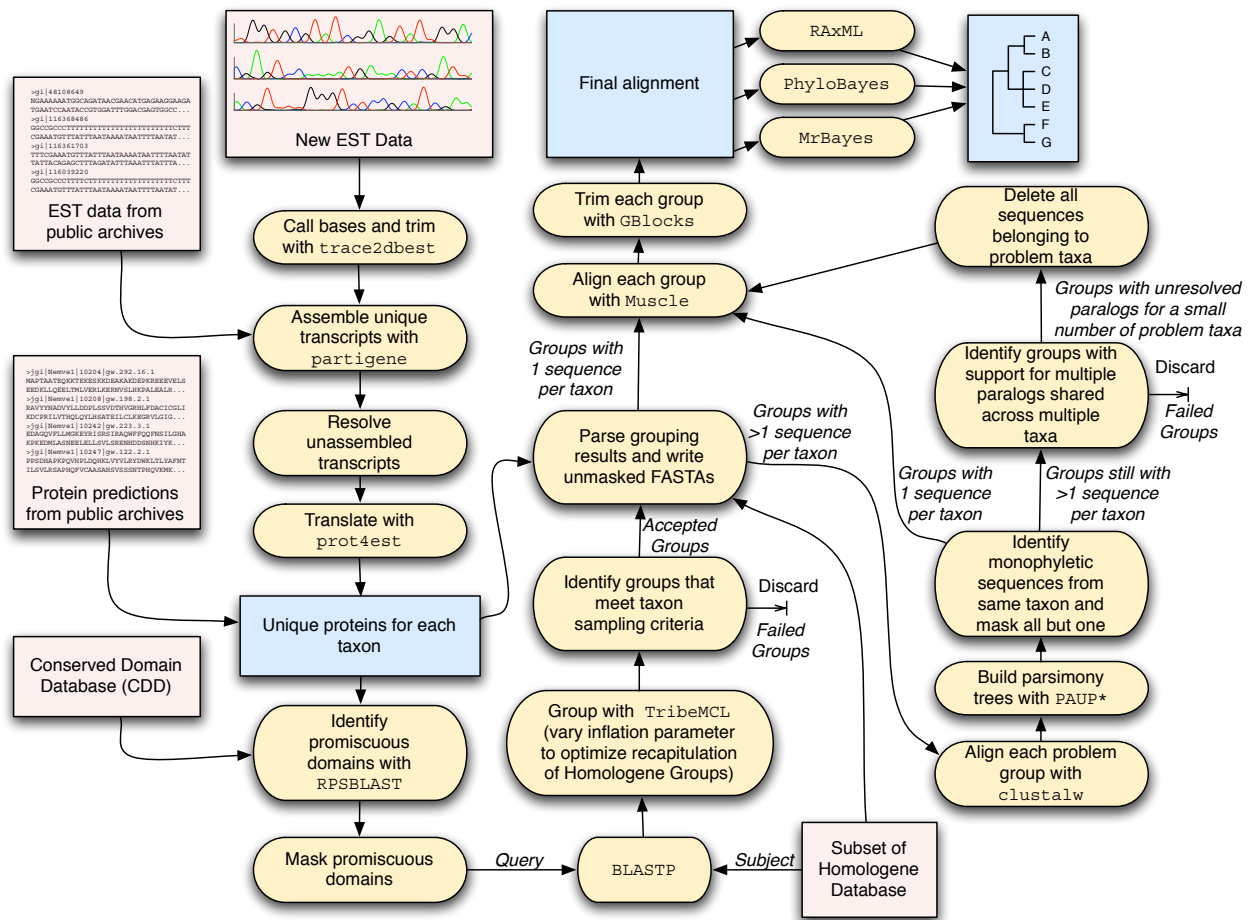

**Supplementary Figure 2 | Flow chart of data analysis.** “Groups” are sets of genes that are hypothesized to be homologous to each other.

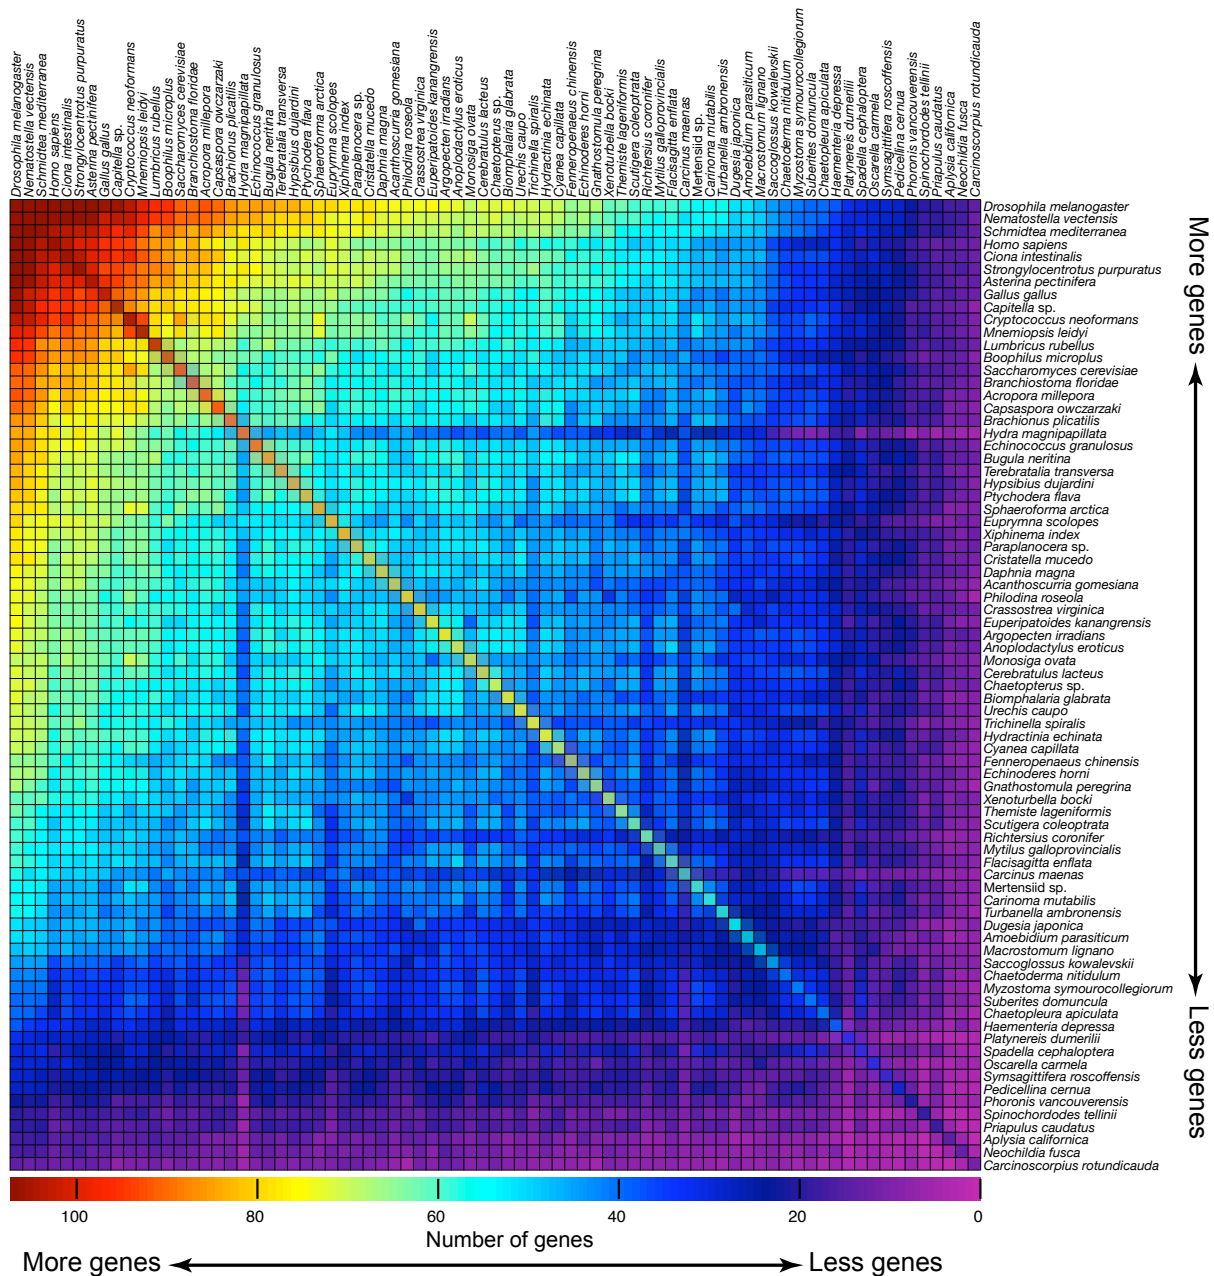

**Supplementary Figure 3 | Diagram of gene sampling.** Each cell is colour coded to indicate how many of the 150 genes selected for phylogenetic analysis are shared between two corresponding taxa. The diagonal shows how many selected genes were found in a given species. Species are ordered with respect to the number of selected genes.

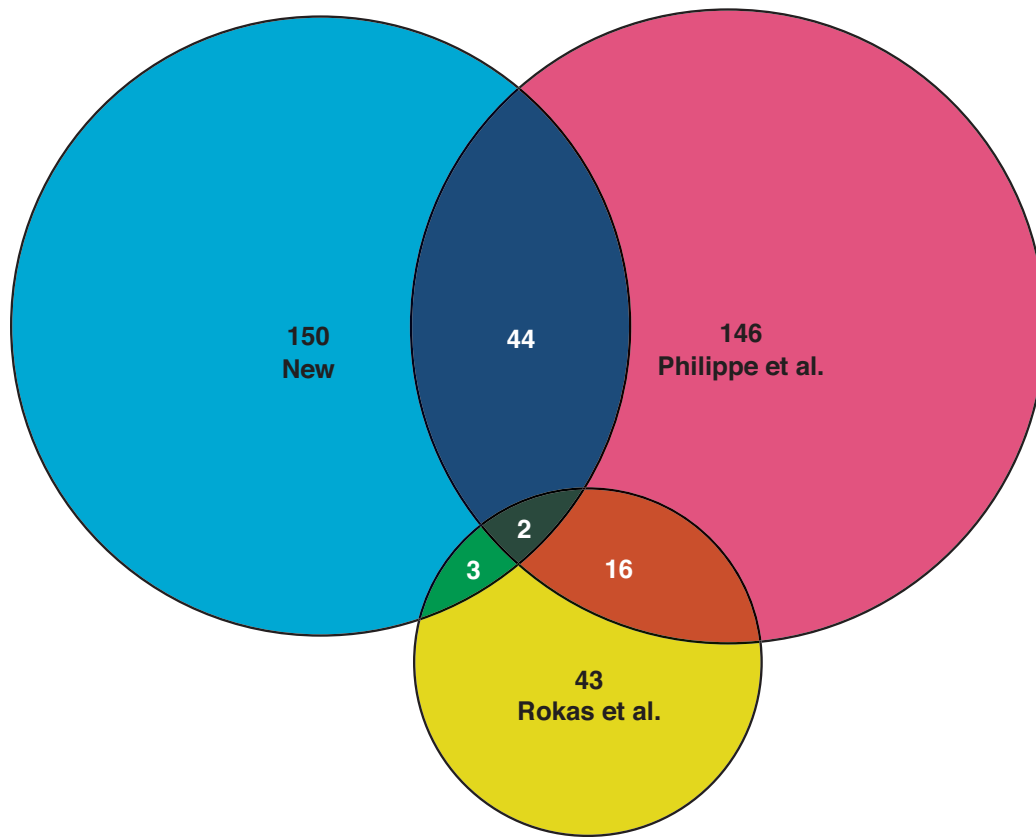

**Supplementary Figure 4 | Venn diagram of gene overlap between the new matrix assembled here, the matrix assembled by Philippe et al.<sup>9</sup>, and the matrix assembled by Rokas et al.<sup>13</sup>**

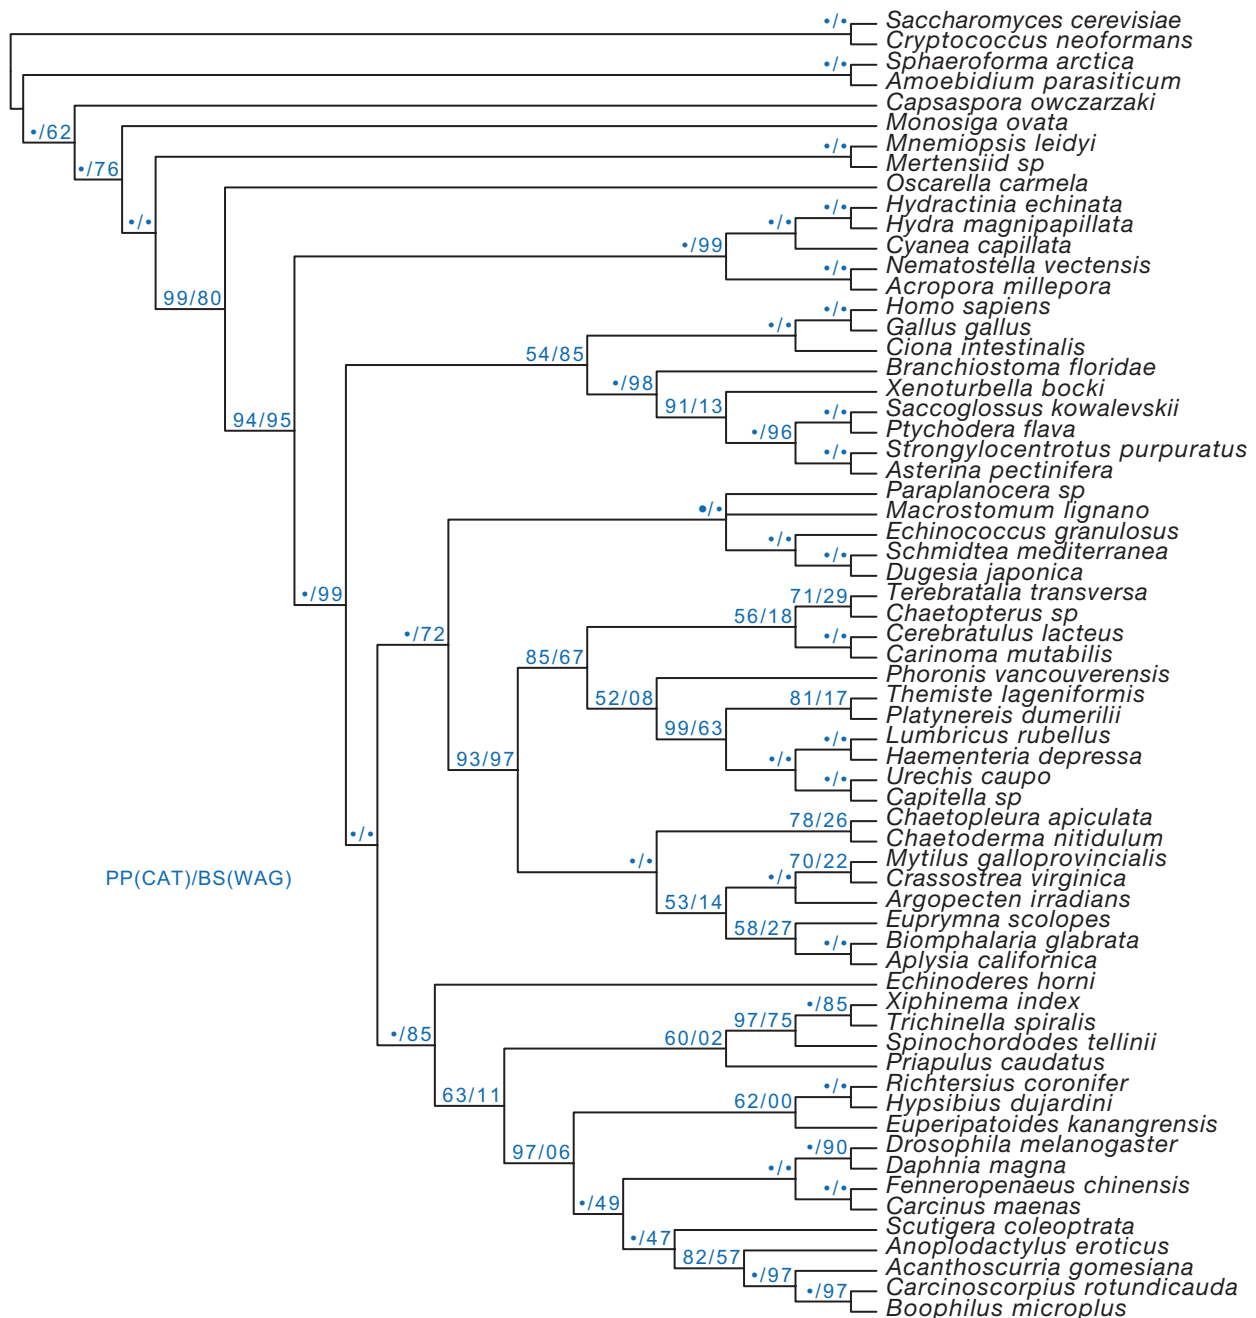

**Supplementary Figure 5 | Cladogram of 64-taxon analyses of the predefined list of genes used in most other animal phylogenomic studies<sup>9</sup>.** The figured topology was recovered from the Bayesian analysis conducted under the CAT model. Posterior probabilities (PP) were estimated under the CAT model (12 Phylobayes runs of 5000

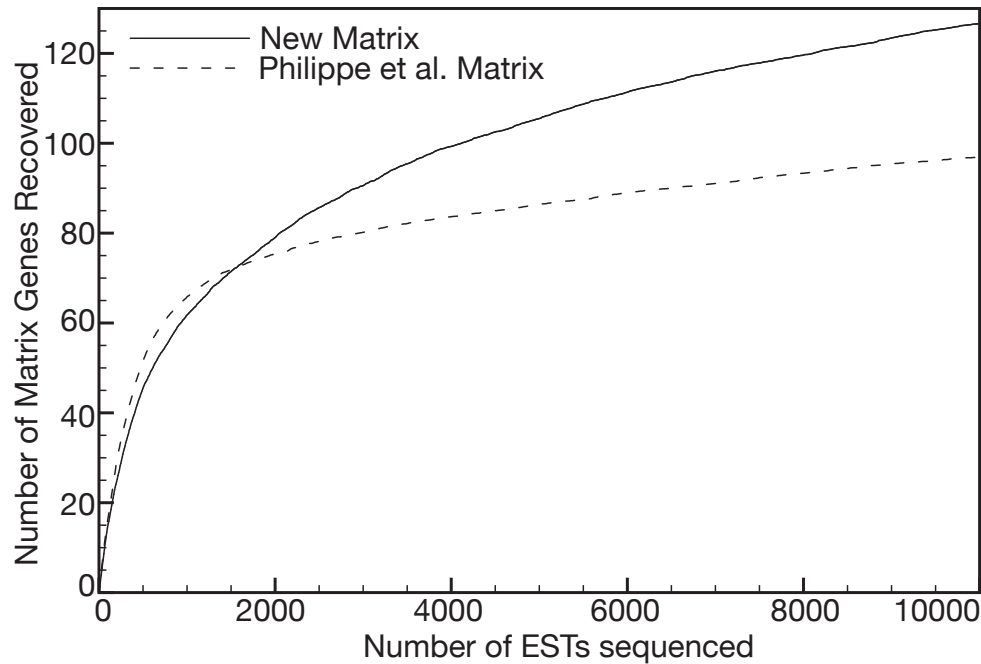

generations each; 1000 generation burnin). ML bootstrap support (BS) was calculated from 1000 bootstrap replicate analyses (RaxML, WAG+Mixed rates model).

**Supplementary Figure 6 | Comparison of gene accumulation curves for our data matrix in relation to that of Philippe et al.<sup>9</sup>** ESTs were pooled across the 29 species for which new data were collected. Accumulations were averaged over 50 rarefied replicates.

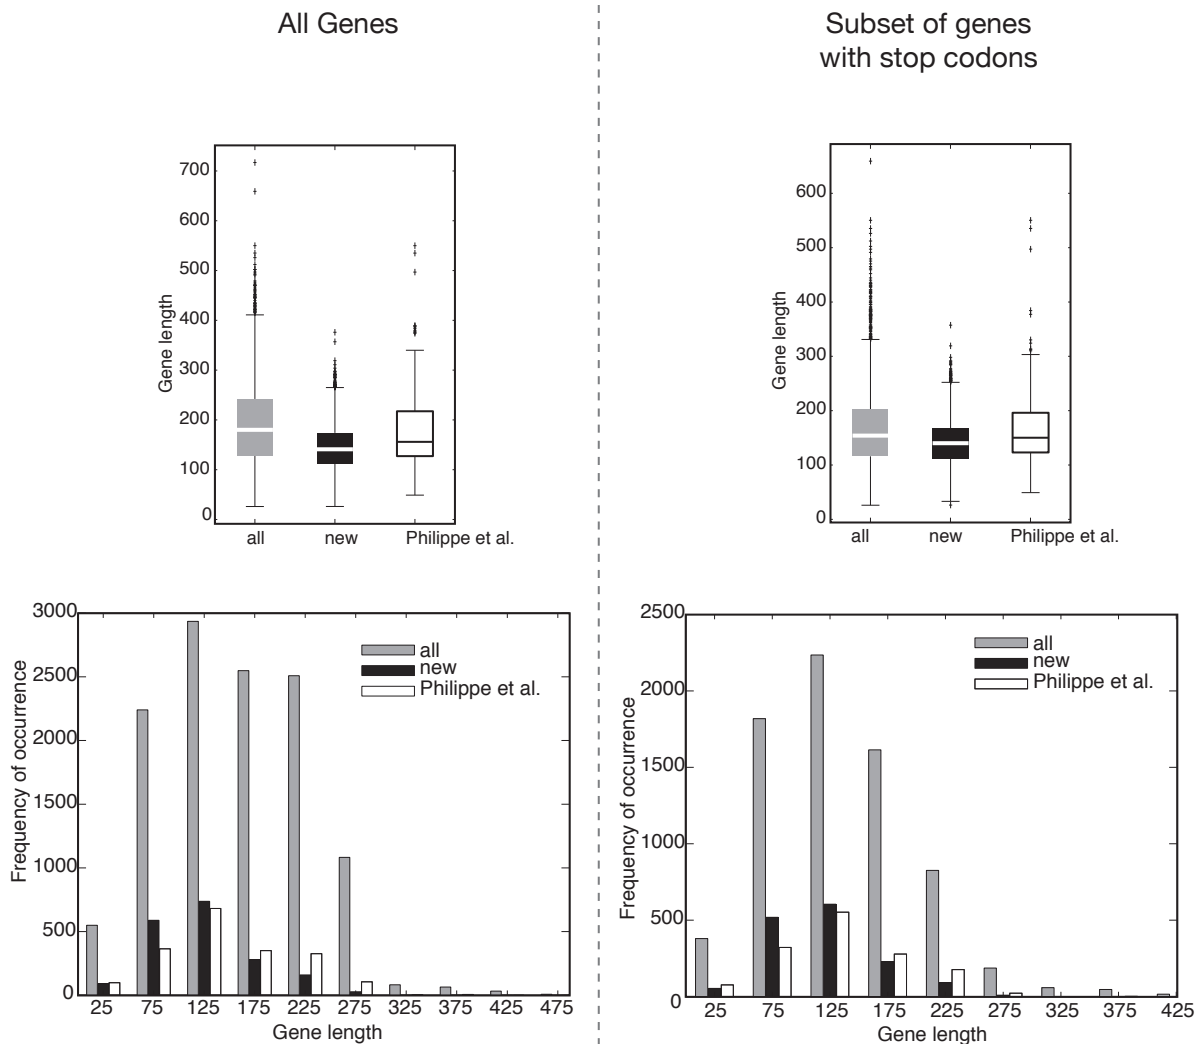

**Supplementary Figure 7 | Distributions of gene lengths (number of amino acids) for newly sequenced data.** “Philippe et al.” designates genes that are orthologs of those in the matrix compiled by Philippe et al.<sup>9</sup>, while “new” designates genes assigned to the 150-gene matrix generated here. The distributions of all genes are shown on the left half of the figure, while only the subset of genes with stop codons are shown on the right half. Only those genes translated by similarity (with BLASTX e-value <  $1 \times 10^{-8}$  to SWISSPROT, <http://www.expasy.org/sprot/>) and extension are considered. The boxes indicate the lower quartile, median, and upper quartile; the whiskers indicate the most extreme values within 1.5 times the interquartile range.

## Acoela

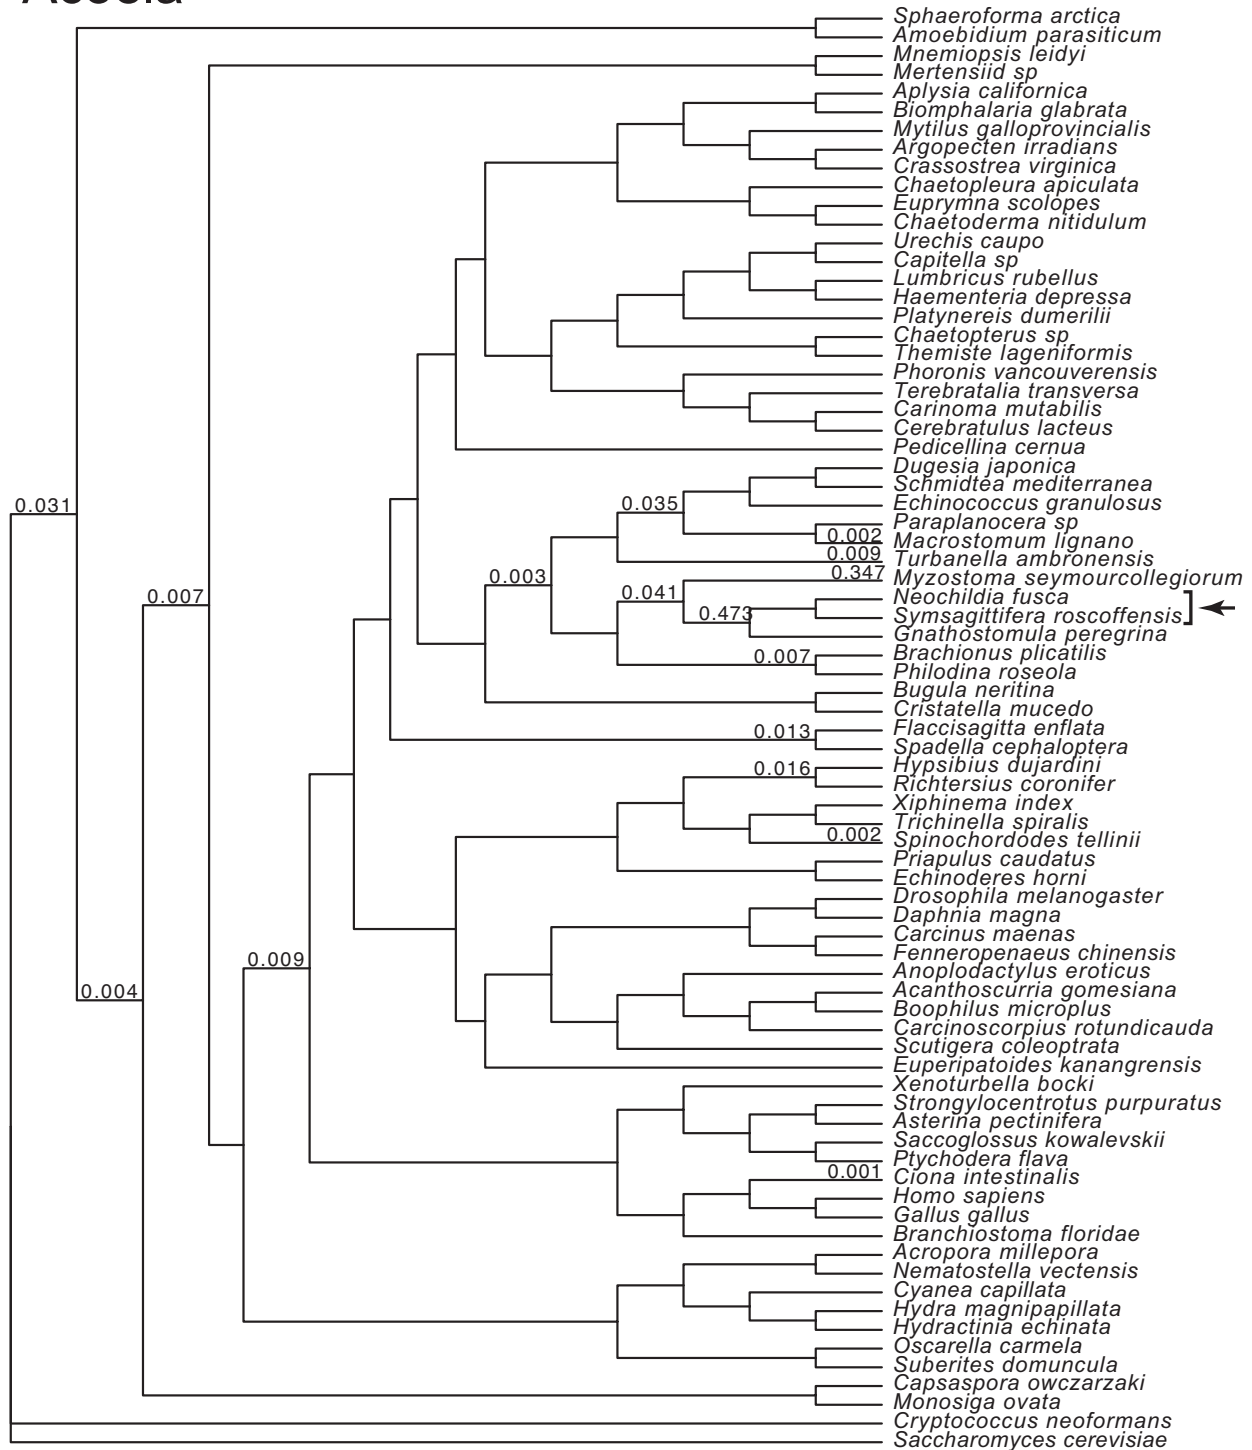

Supplementary Figure 8a

## Bryozoa

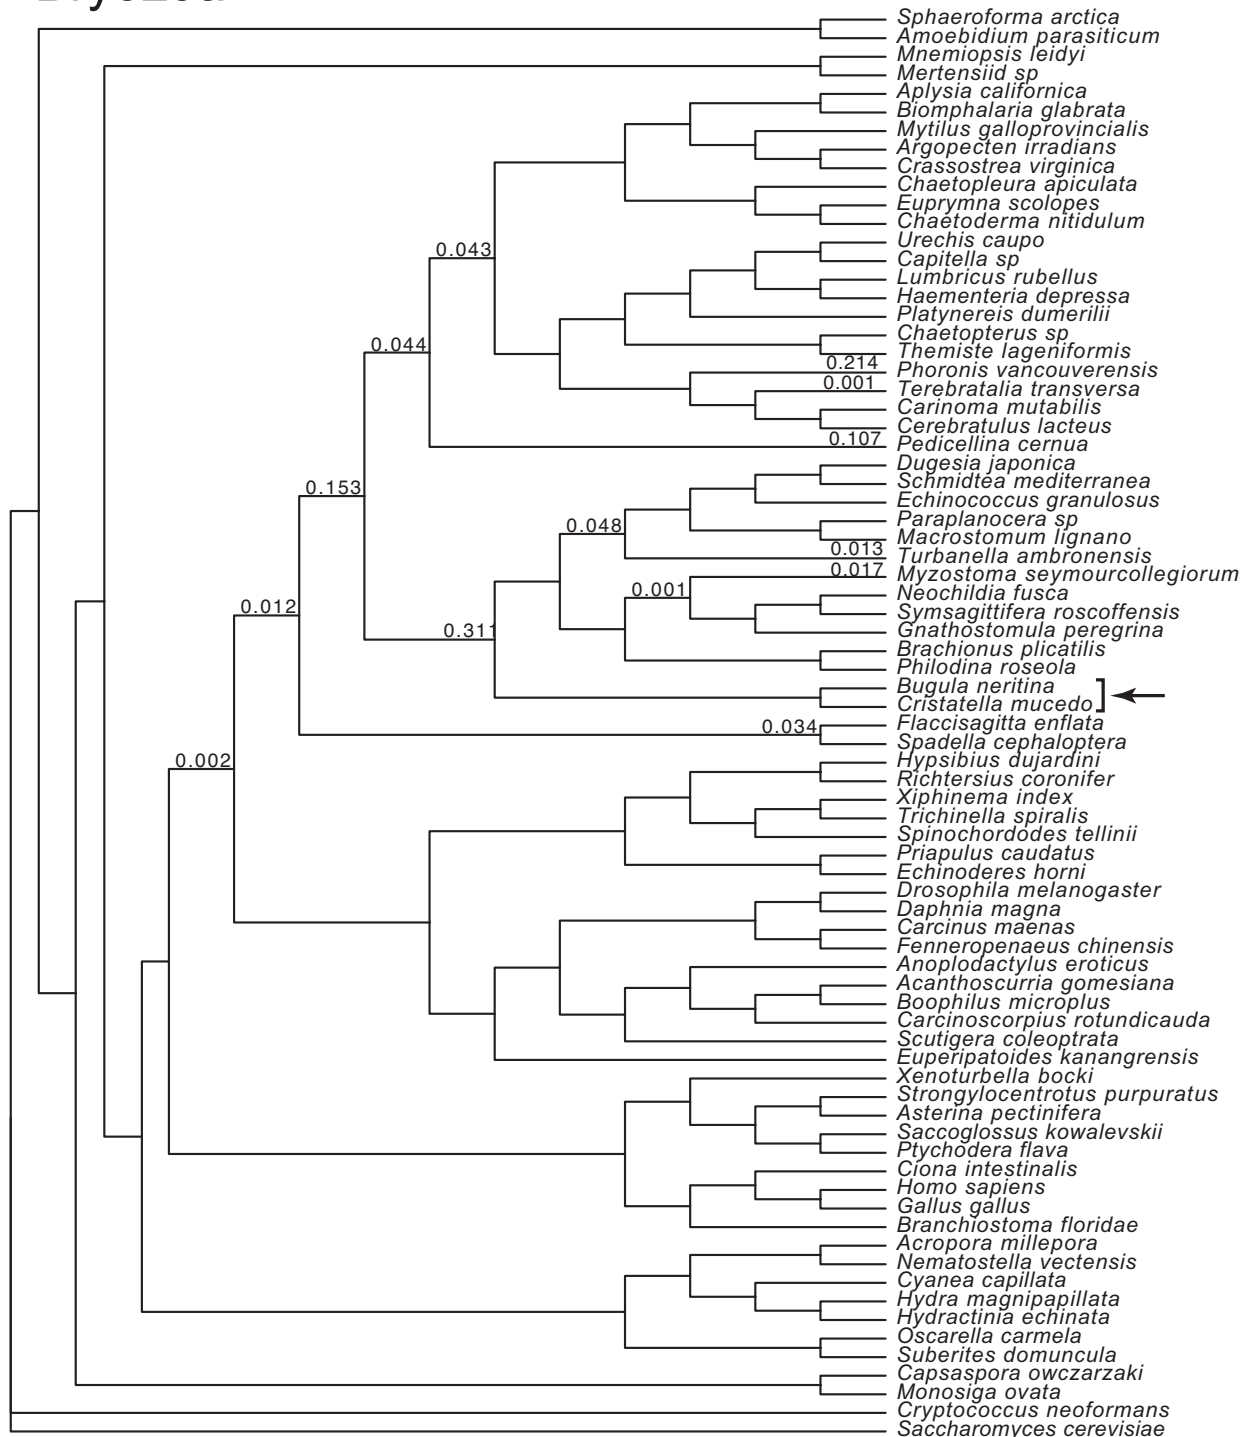

Supplementary Figure 8b



## Chaetognatha

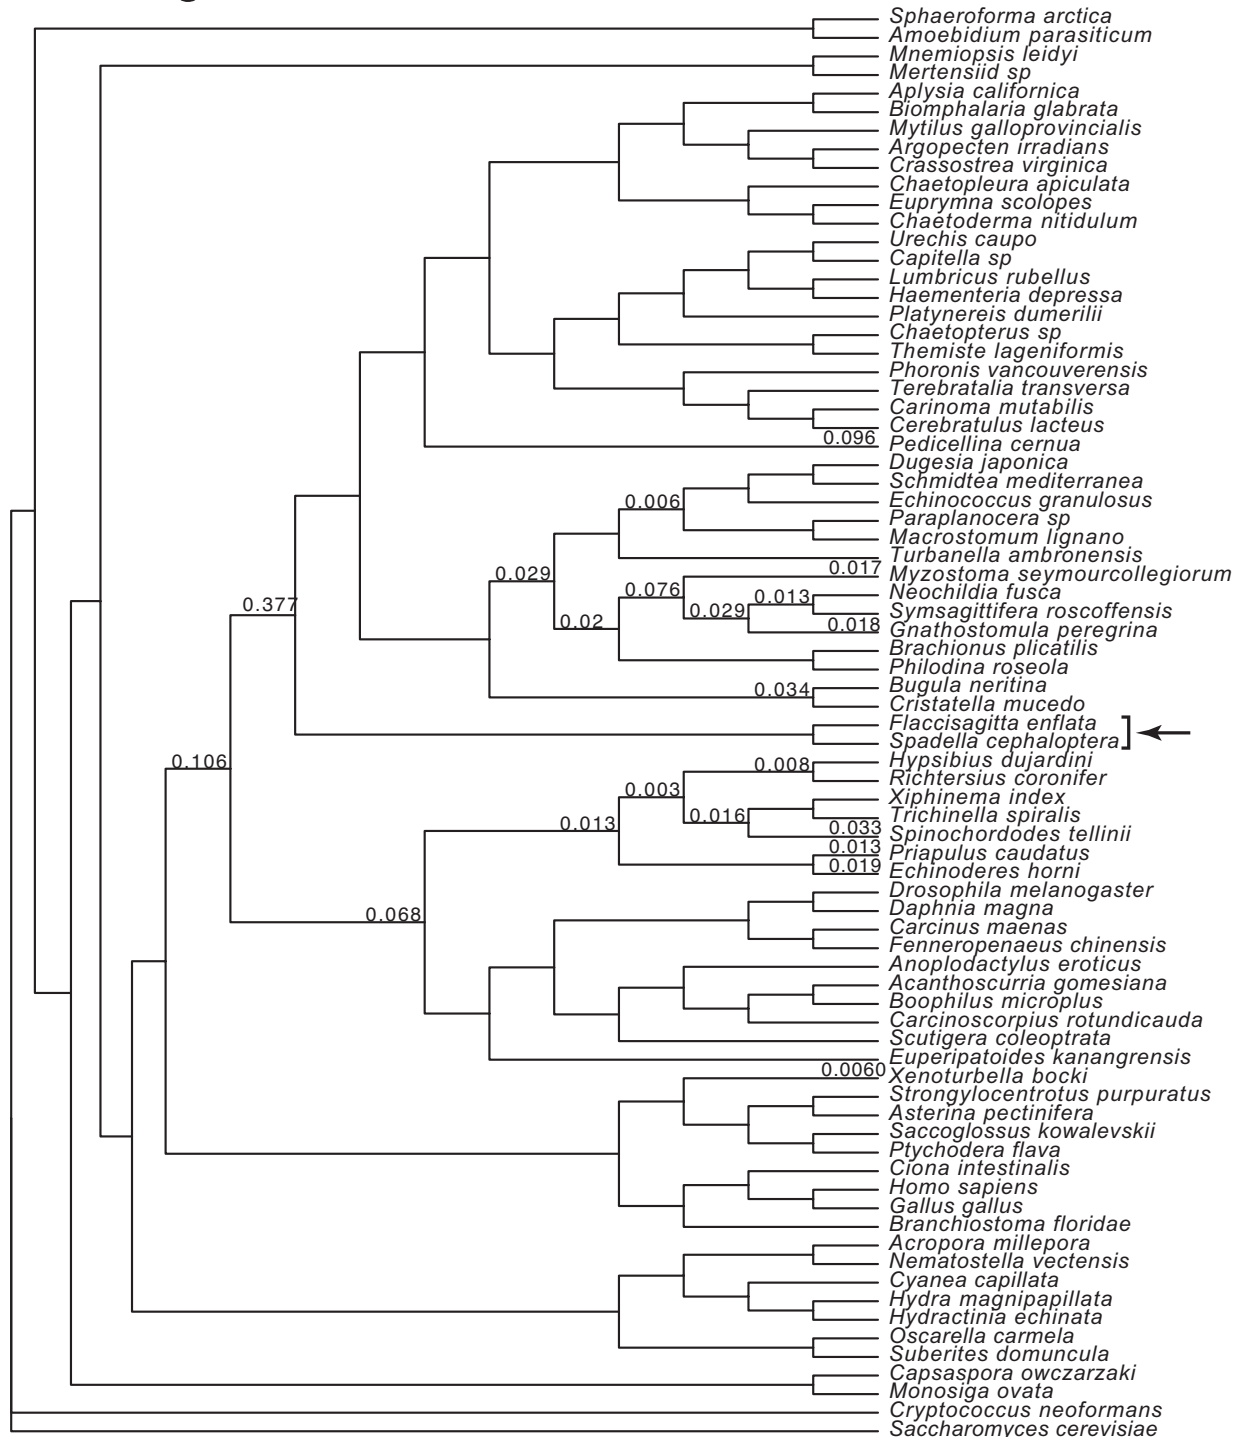

Supplementary Figure 8c

## Rotifera

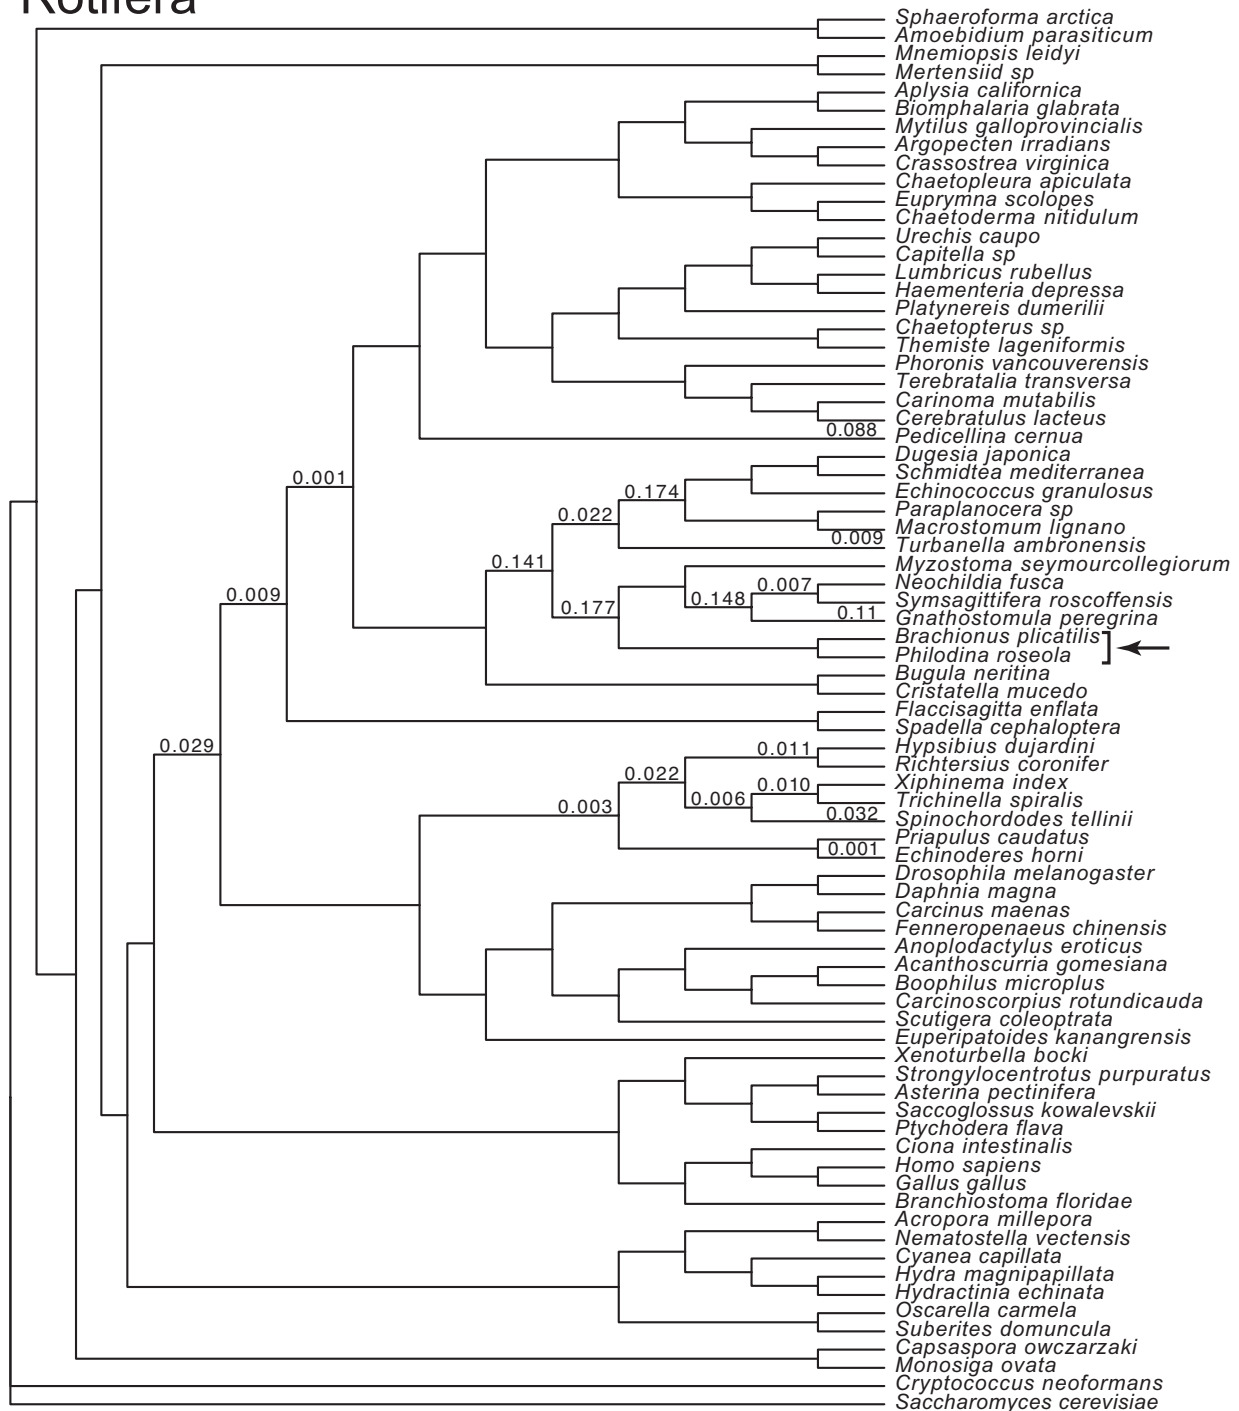

Supplementary Figure 8d

# *Gnathostomula peregrina* (Gnathostomulida)

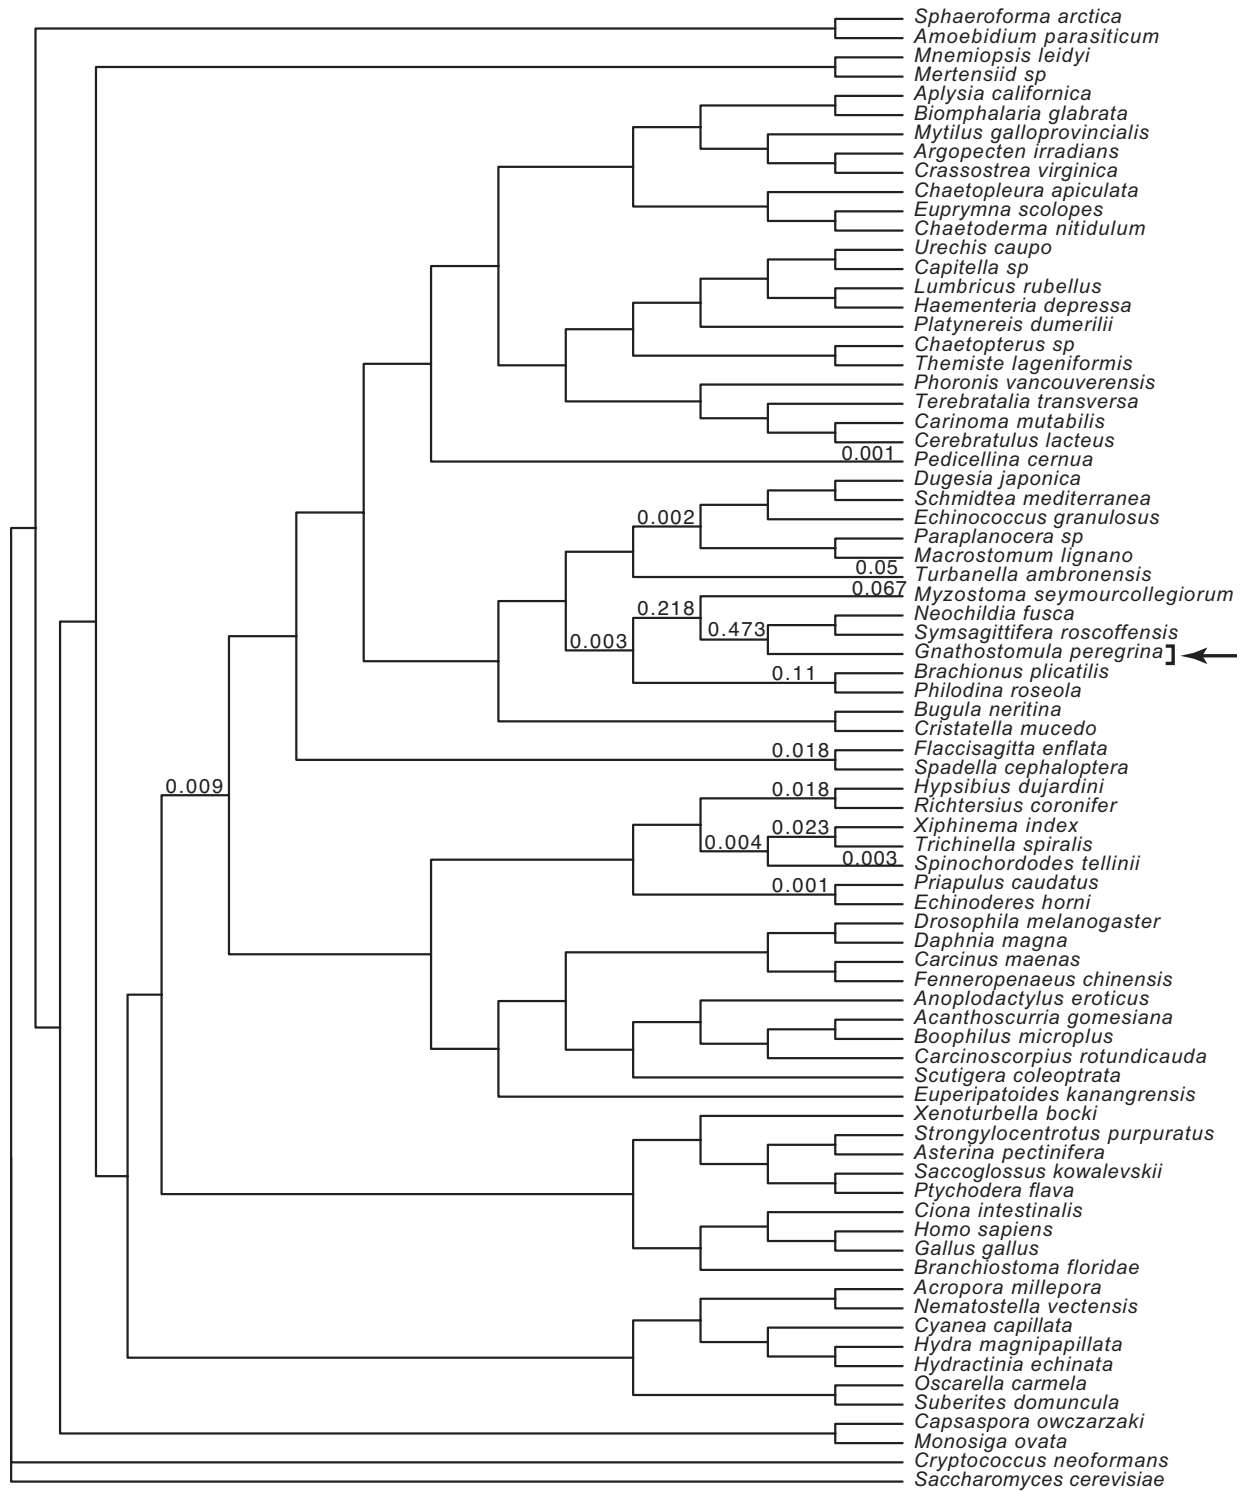

Supplementary Figure 8e

*Myzostoma seymourcollegiorum* (Myzostomida)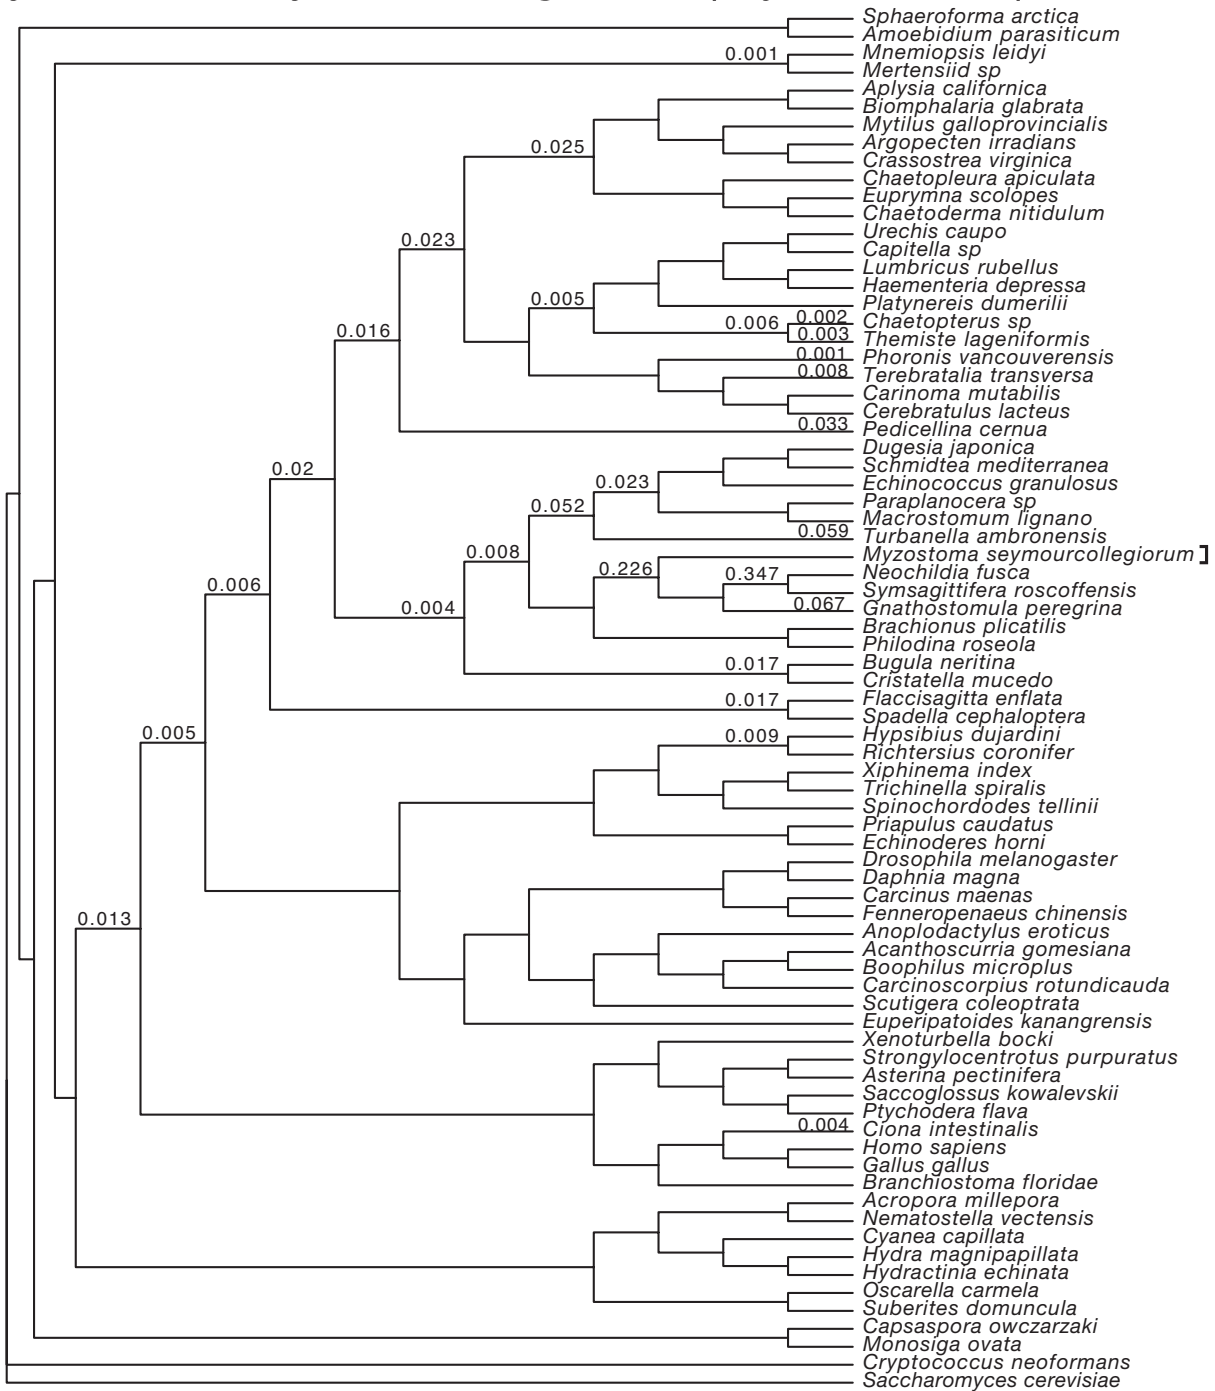

Supplementary Figure 8f

*Pedicellina cernua* (Entoprocta)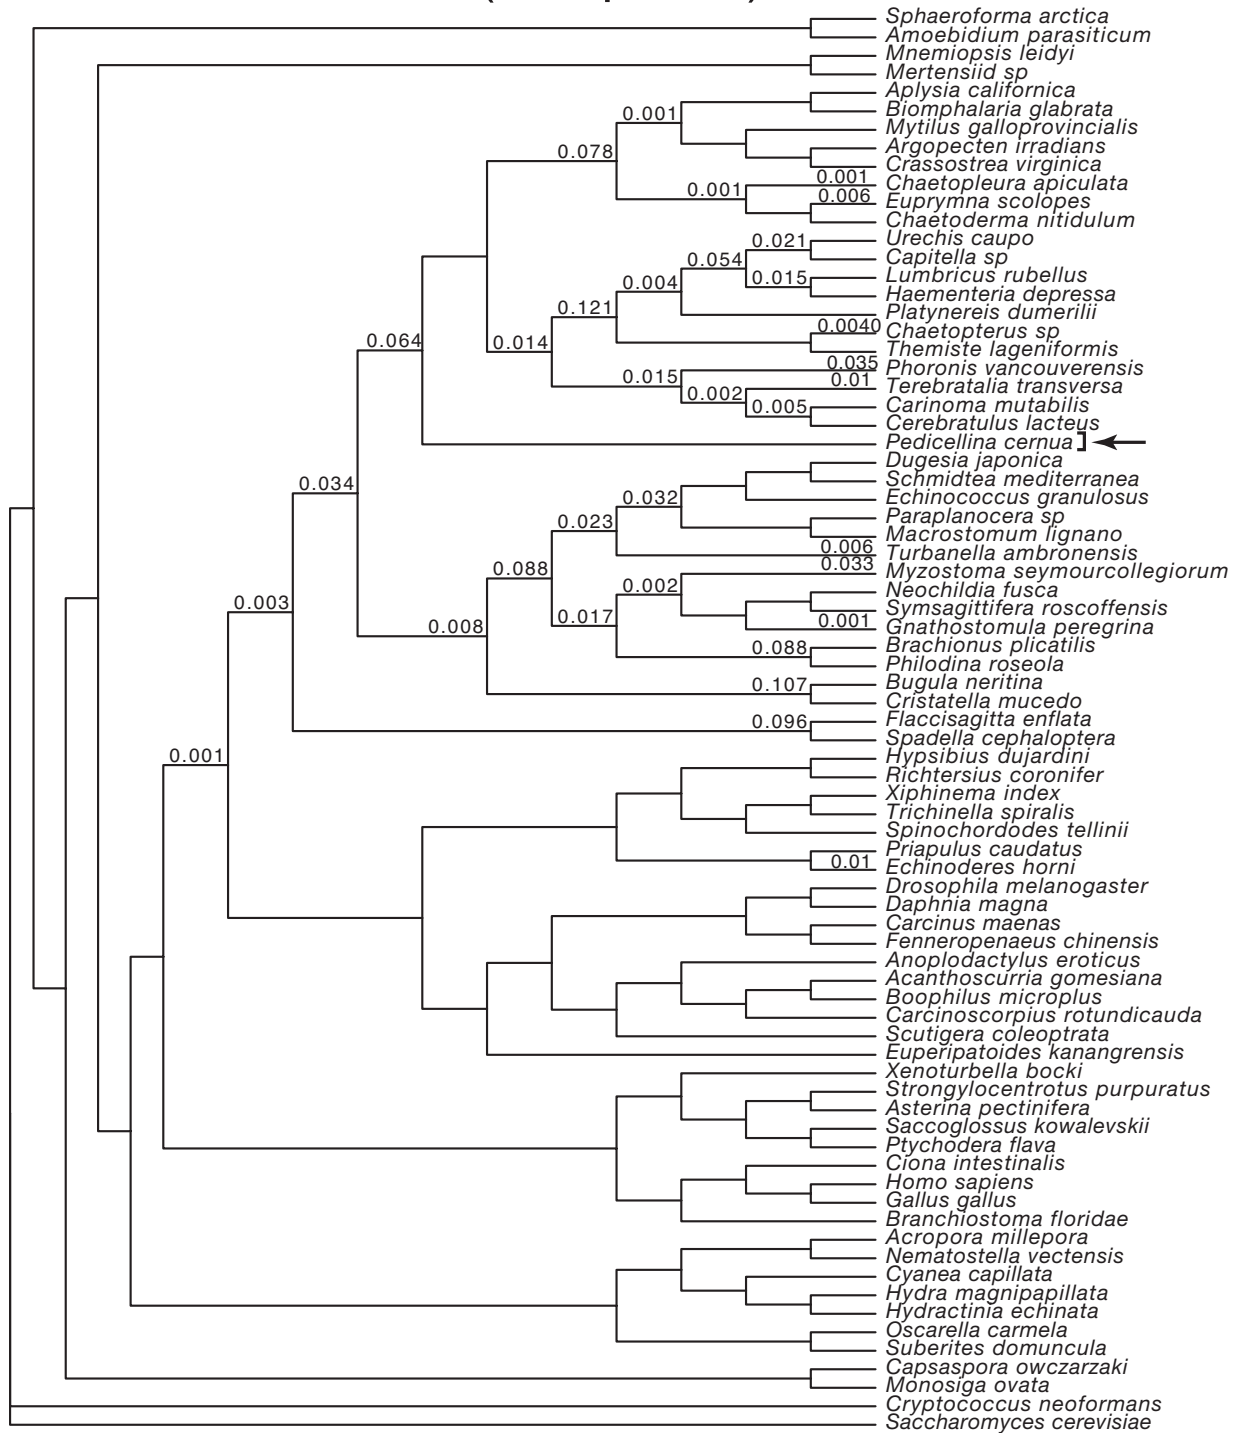

Supplementary Figure 8g

*Suberites domuncula* (Porifera)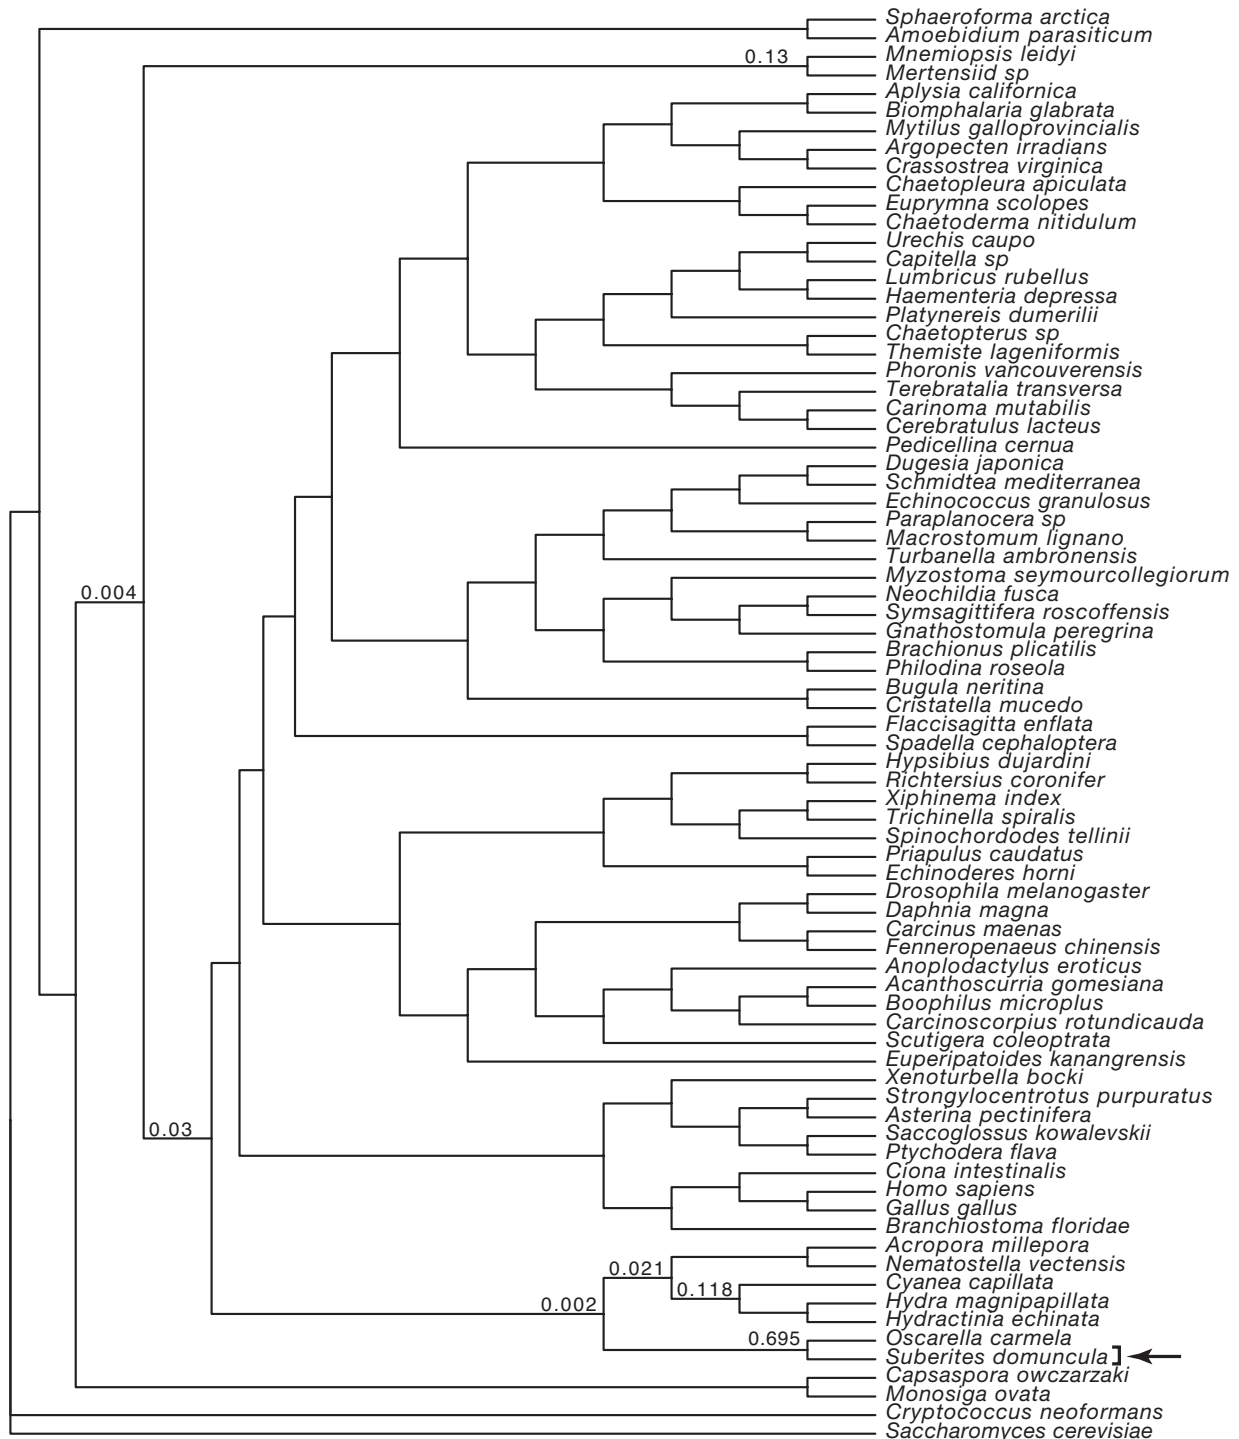

Supplementary Figure 8h

## *Turbanella ambronensis* (Gastrotricha)

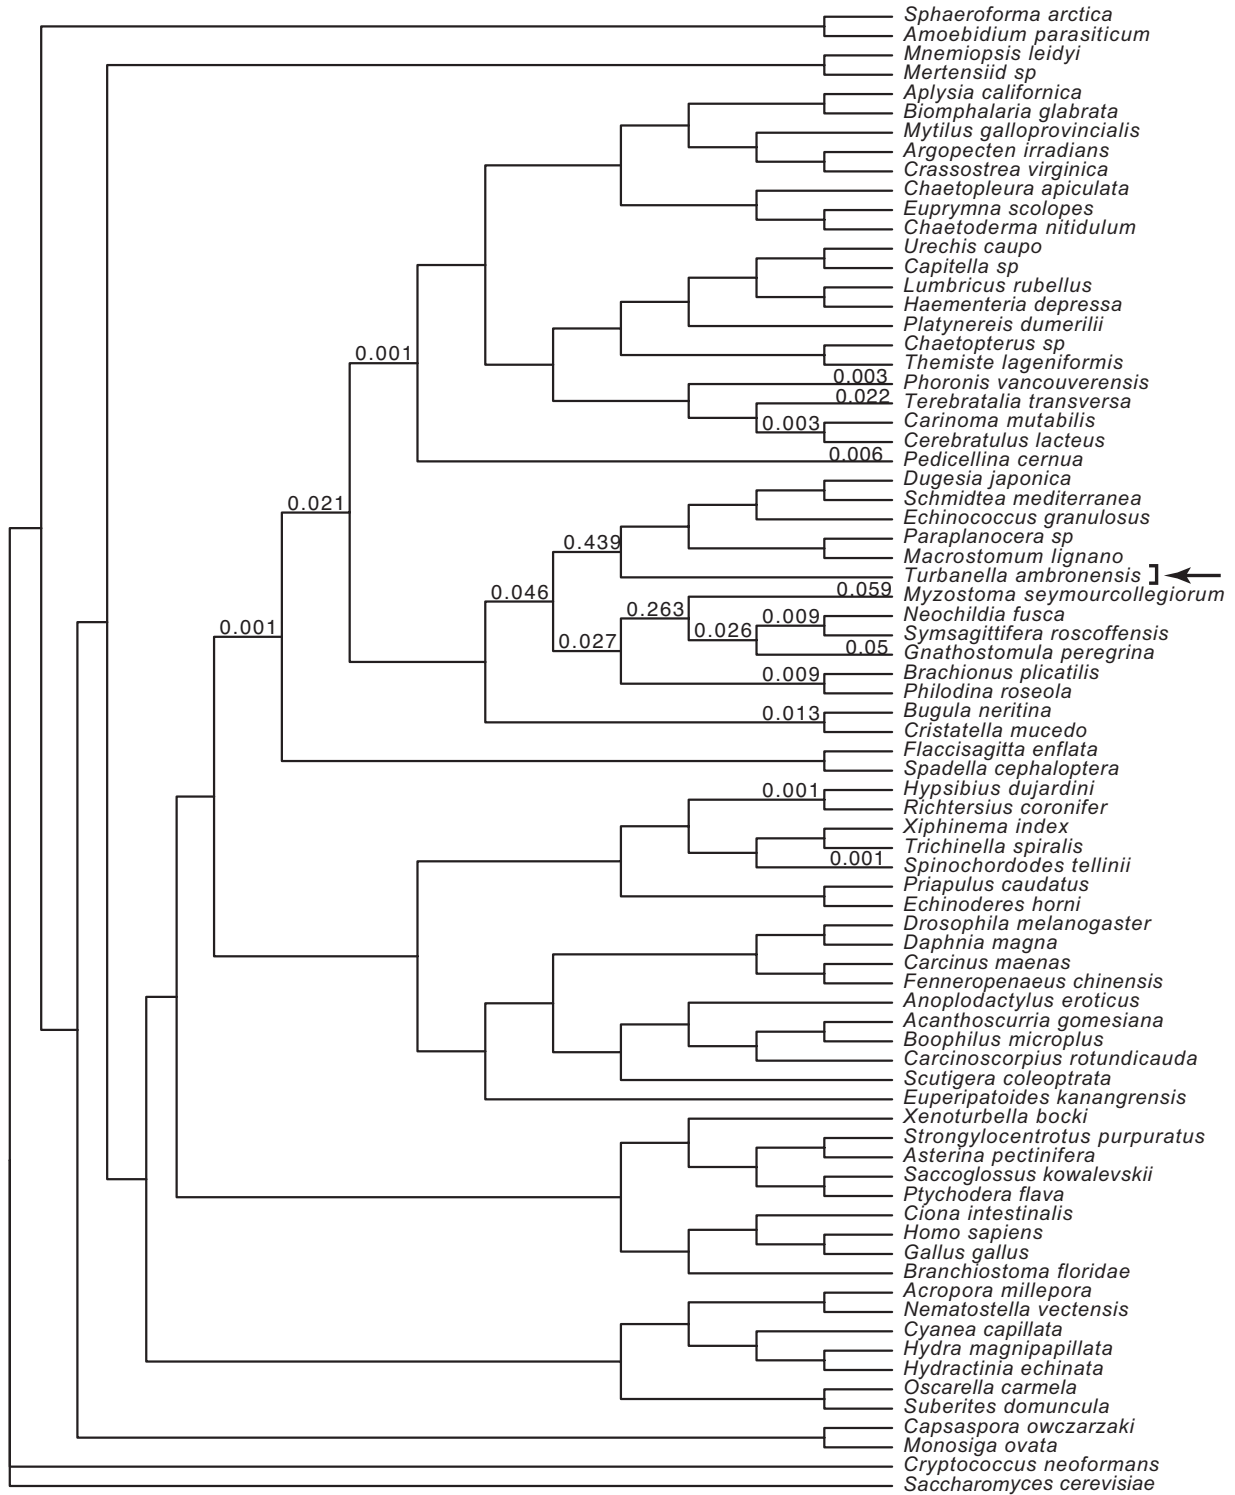

Supplementary Figure 8i

**Supplementary Figure 8 | Alternative positions of unstable taxa in 77-taxon ML bootstrap analyses.** The topology is the best-known tree found in the 1000 ML searches. The number along each branch indicates the fraction of trees in which the focal taxon attaches along that branch. Unlike bipartition support (as in consensus trees), terminal branches can also have values (which indicate that the focal taxon attaches along the terminal branch). The fraction for the most likely position is indicated along the branch subtending the node that gives rise to the stem of the focal taxon. Values of 0 are omitted for clarity.



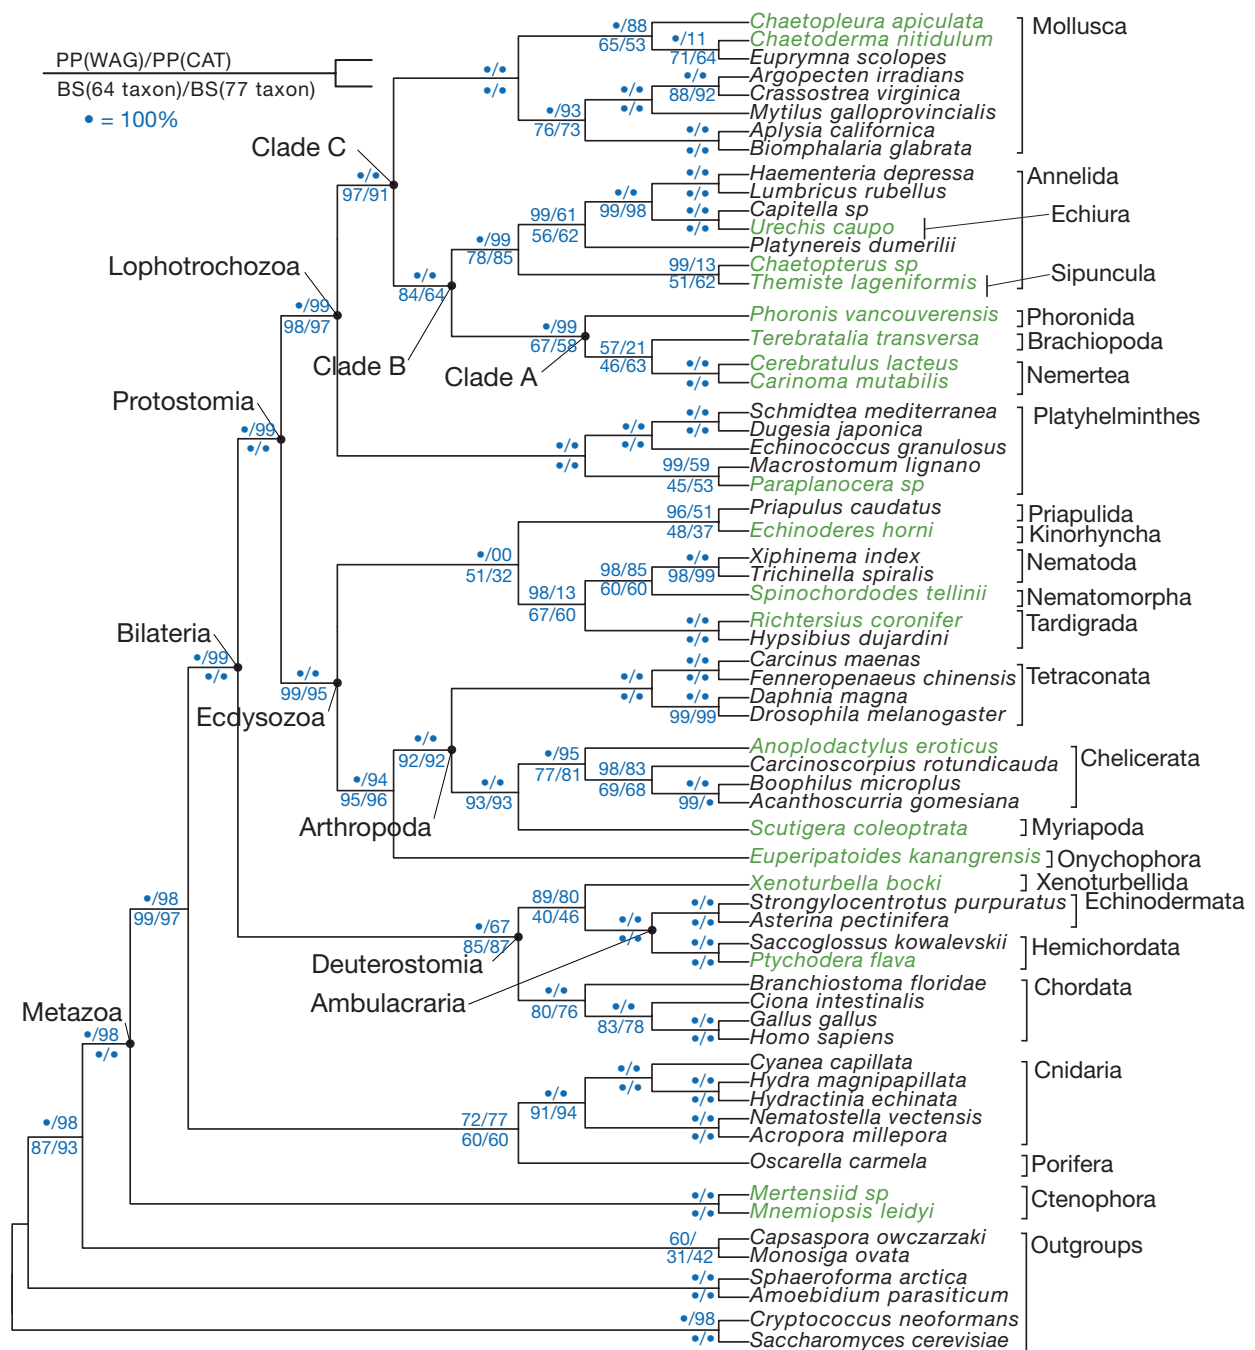

**Supplementary Figure 9 | Cladogram of 64-taxon analyses.** The figured topology is for the best known tree found in 1000 searches (WAG+Mixed rates model, log likelihood= -699741.6), with support values calculated from the same bootstrap and posterior treesets as Fig. 2.

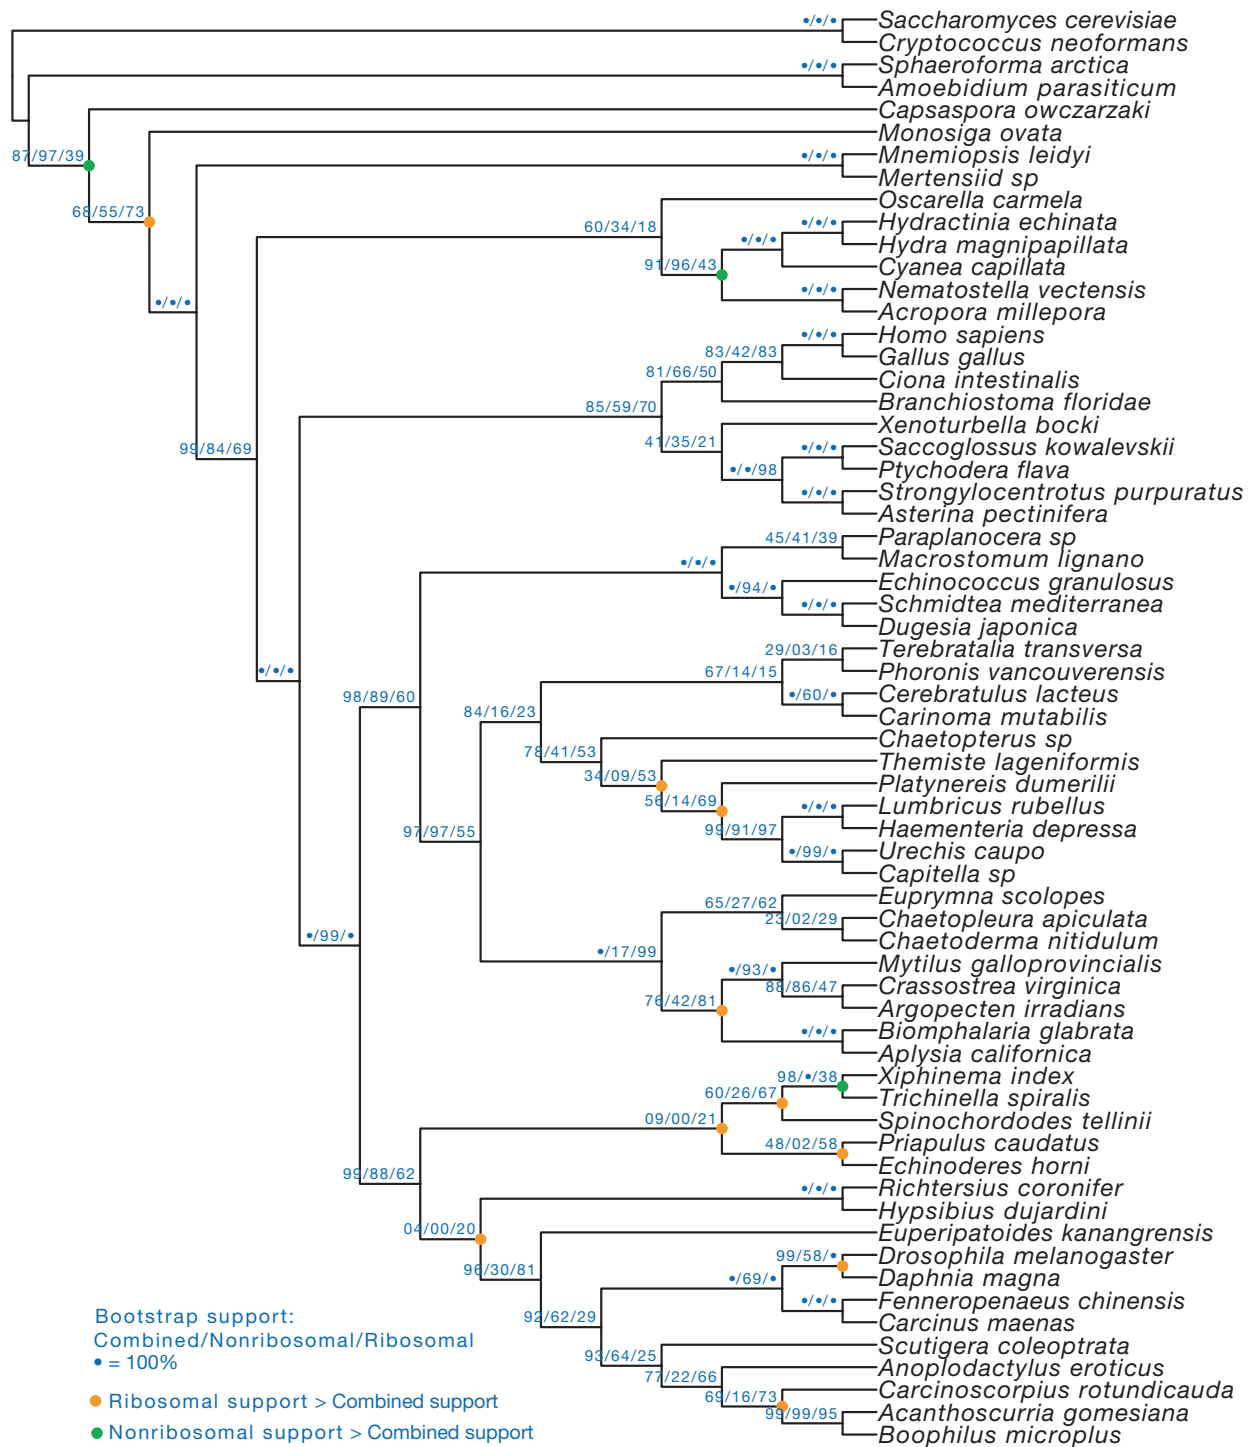

Supplementary Figure 10a

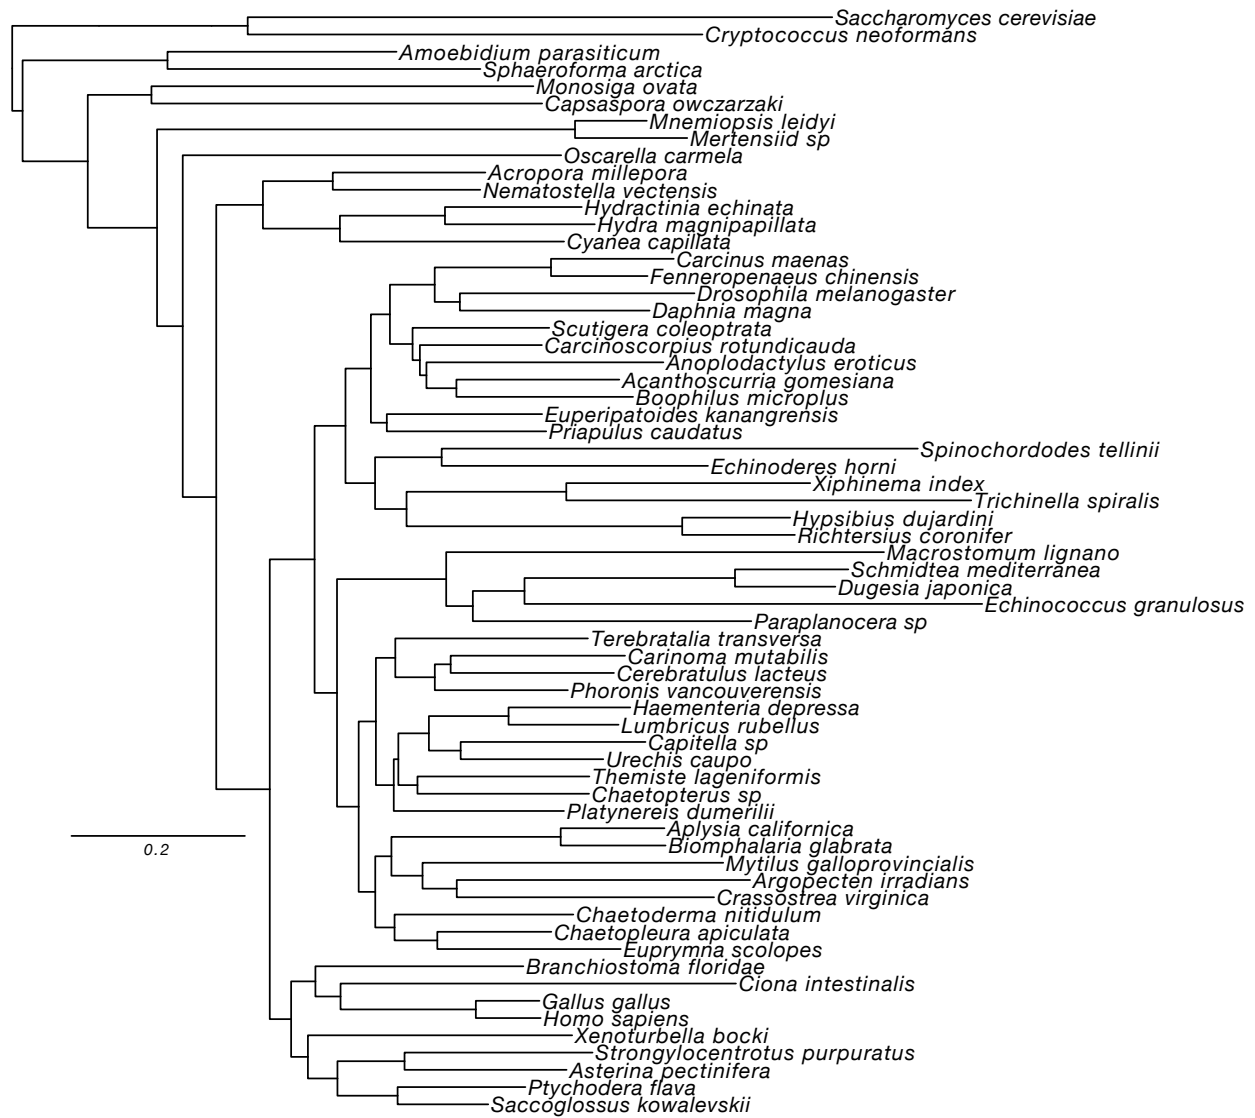

Supplementary Figure 10b

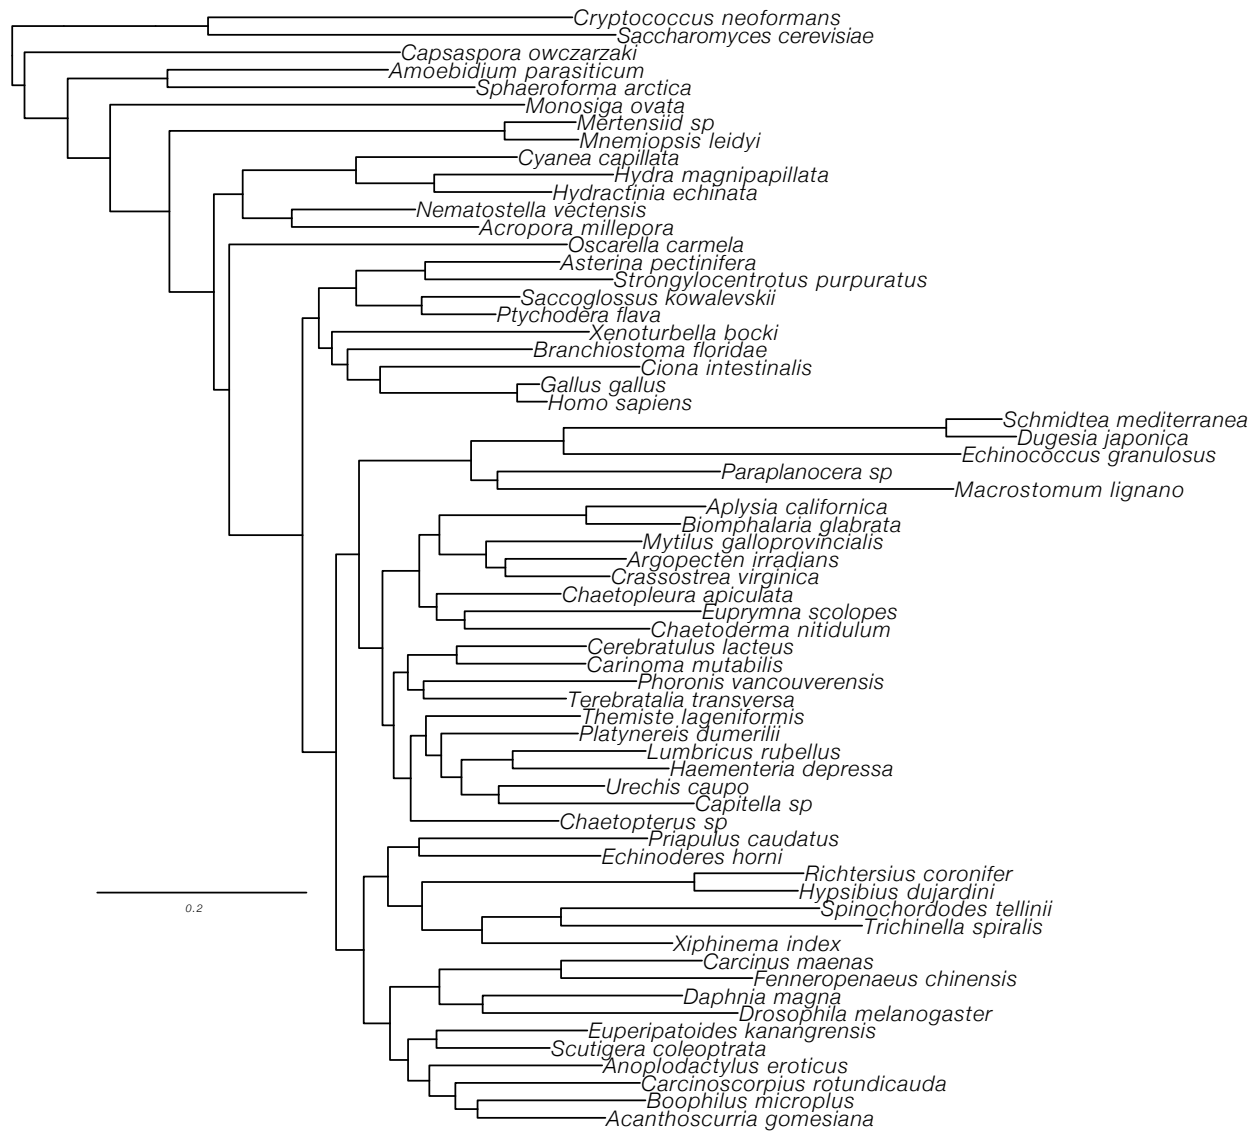

Supplementary Figure 10c

**Supplementary Figure 10 | Independent analyses of ribosomal and non-ribosomal proteins (calculated for the 64 stable taxa).** a- ML bootstrap support from ribosomal and non-ribosomal proteins (1000 bootstrap replicates, RaxML, WAG+Mixed rates model), mapped onto the cladogram from Fig. 2. Bootstrap support for the combined matrix is reproduced from Fig. 2 for convenience. b,c- Phylograms of the sampled trees with the highest likelihood (500 replicate searches, RaxML, WAG+Mixed rates model) for the 110 non-ribosomal proteins (log likelihood = -491006.9) and 40 ribosomal (log likelihood = -207699.5), respectively.

## Supplementary Notes

Additional references cited in Supplementary Information

- 41 F. Marletaz, E. Martin, Y. Perez et al., *Curr Biol* **16** (15), R577 (2006).
- 42 E.T. Munoz, L.D. Bogarad, and M.W. Deem, *BMC Genomics* **5**, 30 (2004).
- 43 Y. Yang, S. Cun, X. Xie et al., *FEBS Lett* **538** (1-3), 183 (2003).
- 44 D. Q. Matus, R. R. Copley, C. W. Dunn et al., *Curr Biol* **16** (15), R575 (2006).
